# Supplementary material for: Knockdown of Splicing Complex Protein PCBP2 Reduces Extravillous Trophoblast Differentiation Through Transcript Switching
Source: Front Cell Dev Biol. 2021 May 20;9:671806. doi: 10.3389/fcell.2021.671806 (PMC8172583; doi:10.3389/fcell.2021.671806)
Supplement: Supplementary file 3 [file Table_3.XLSX]

## Sheet: Supplementary Table 3
gene	gene adj_pvalue	transcript	transcript adj_pvalue	proportion_NT	proportion_PCBP2	ratio PCBP2/NT	mean counts NT	mean counts PCBP2
ABR	2.29888e-12	ENST00000291107.6	0.0513296	0.744391	0.667204	0.896309	1410.03	1253.38
ABR	2.29888e-12	ENST00000302538.9	0.561285	0.203487	0.16679	0.819657	383.264	315.785
ABR	2.29888e-12	ENST00000573895.1	4.95819e-10	0.0521215	0.166006	3.18498	96.3921	308.267
AC073896.1	0.000120172	ENST00000547423.5	0.0137279	0.0657691	0.483534	7.352	18.5259	85.9243
AC073896.1	0.000120172	ENST00000549318.5	0.0137279	0.934231	0.516466	0.552825	106.842	73.0979
AC092718.8	0.000398071	ENST00000638192.1	0.0306292	0.0226815	0.31177	13.7456	7.43233	29.2918
AC092718.8	0.000398071	ENST00000640345.1	0.0306292	0.977319	0.68823	0.704202	77.2509	62.7344
AC233723.1	2.07102e-05	ENST00000571067.1	0.00376469	0.866172	0.140665	0.162399	26.2848	6.97624
AC233723.1	2.07102e-05	ENST00000635921.1	0.00376469	0.133828	0.859335	6.42118	11.1836	25.565
ACAD10	0.000884776	ENST00000313698.9	0.648933	0.400487	0.245584	0.613213	115.99	72.5979
ACAD10	0.000884776	ENST00000413681.7	1	0.251081	0.250347	0.997077	77.2861	74.3337
ACAD10	0.000884776	ENST00000549590.5	1	0.307258	0.267706	0.871274	88.9573	79.7592
ACAD10	0.000884776	ENST00000552706.6	0.009953	0.0411748	0.236364	5.7405	32.5568	69.8666
ACAP1	0.000159723	ENST00000570504.5	0.00337435	0.200139	0.611777	3.05675	47.489	121.799
ACAP1	0.000159723	ENST00000574499.1	0.423937	0.385695	0.174704	0.452959	59.3806	28.9393
ACAP1	0.000159723	ENST00000575415.1	0.568836	0.414166	0.213519	0.51554	61.8369	37.0105
ACLY	0.000800059	ENST00000352035.7	0.70578	0.493263	0.469828	0.95249	7802.37	7448.77
ACLY	0.000800059	ENST00000353196.5	0.501082	0.12515	0.146411	1.16989	1972.44	2312.6
ACLY	0.000800059	ENST00000393896.6	0.137028	0.164078	0.199225	1.21421	2595.63	3153.39
ACLY	0.000800059	ENST00000590151.5	0.217678	0.21751	0.184536	0.848406	3432.47	2915.85
ACOX3	9.26102e-05	ENST00000356406.10	0.54114	0.626686	0.476751	0.76075	385.974	382.81
ACOX3	9.26102e-05	ENST00000503233.5	0.990436	0.308233	0.264862	0.859291	185.696	207.257
ACOX3	9.26102e-05	ENST00000514423.1	0.0032006	0.0650808	0.258387	3.97025	71.5711	205.314
ACSM2B	2.27196e-08	ENST00000564855.1	2.94287e-06	0.376136	0.011823	0.0314327	71.9965	2.01461
ACSM2B	2.27196e-08	ENST00000566384.5	0.362099	0.107238	0.261797	2.44128	13.037	29.7721
ACSM2B	2.27196e-08	ENST00000569131.5	0.219086	0.516626	0.72638	1.40601	87.9589	89.1324
ADCY6	7.46725e-05	ENST00000307885.4	0.969236	0.366199	0.398703	1.08876	412.165	399.48
ADCY6	7.46725e-05	ENST00000357869.7	0.00274616	0.16576	0.0221006	0.133329	196.802	49.9442
ADCY6	7.46725e-05	ENST00000550422.5	0.701298	0.468041	0.579197	1.23749	542.006	590.186
ADM2	0.000163745	ENST00000395737.2	0.0172183	0.314064	0.0419104	0.133445	64.2666	16.7497
ADM2	0.000163745	ENST00000395738.2	0.0172183	0.685936	0.95809	1.39676	146.592	165.857
AGO1	1.88562e-05	ENST00000373204.6	0.635281	0.116246	0.138884	1.19474	211.09	239.475
AGO1	1.88562e-05	ENST00000373206.5	0.000825741	0.130602	0.073446	0.562364	238.447	127.602
AGO1	1.88562e-05	ENST00000674304.1	0.988174	0.636905	0.648786	1.01865	1166.09	1128.23
AGO1	1.88562e-05	ENST00000674426.1	0.635281	0.116246	0.138884	1.19474	211.09	239.475
AIF1L	0.000151493	ENST00000247291.8	0.0164581	0.981892	0.834386	0.849773	1321.29	947.305
AIF1L	0.000151493	ENST00000372301.2	0.0164581	0.0181076	0.165614	9.14612	99.3348	172.965
AIG1	0.000168096	ENST00000357847.9	0.510203	0.267776	0.3324	1.24134	212.394	232.037
AIG1	0.000168096	ENST00000367596.5	0.0105234	0.622554	0.479093	0.76956	501.904	337.922
AIG1	0.000168096	ENST00000494282.6	0.100022	0.10967	0.188507	1.71885	85.4033	130.177
AL035685.1	1.62096e-05	ENST00000637091.1	0.0032006	0.600568	0.0438633	0.0730364	19.7301	1.80307
AL035685.1	1.62096e-05	ENST00000637341.1	0.0032006	0.399432	0.956137	2.39374	12.1086	19.4077
ALG14	0.00103831	ENST00000370205.6	1	0.235089	0.24968	1.06207	126.046	139.186
ALG14	0.00103831	ENST00000495856.1	0.579471	0.510354	0.682685	1.33767	289.451	406.458
ALG14	0.00103831	ENST00000507727.2	0.0218496	0.254557	0.0676351	0.265697	142.9	84.8873
ALKBH8	1.20124e-05	ENST00000260318.6	0.953116	0.256753	0.219279	0.854045	100.492	86.3098
ALKBH8	1.20124e-05	ENST00000393100.3	0.287665	0.0936523	0.272851	2.91344	69.4523	116.335
ALKBH8	1.20124e-05	ENST00000417449.6	0.583339	0.344605	0.480825	1.39529	145.776	213.041
ALKBH8	1.20124e-05	ENST00000530933.1	0.00201197	0.304989	0.0270456	0.0886774	125.063	34.2905
ANKRD13D	4.65547e-06	ENST00000308440.11	0.0157698	0.312384	0.539928	1.72841	262.654	416.066
ANKRD13D	4.65547e-06	ENST00000511455.7	0.000992806	0.378126	0.145436	0.384623	324.437	116.94
ANKRD13D	4.65547e-06	ENST00000512101.5	0.991774	0.30949	0.314636	1.01663	257.628	231.071
ANKS6	0.00120559	ENST00000353234.5	0.988359	0.508946	0.586263	1.15192	563.337	437.984
ANKS6	0.00120559	ENST00000466120.1	0.0238328	0.23015	0.065478	0.284502	246.347	95.6767
ANKS6	0.00120559	ENST00000486778.1	0.880123	0.260904	0.348259	1.33482	280.226	255.707
ANXA2	0.000222835	ENST00000421017.6	0.0210219	0.609378	0.558636	0.916731	83268.1	72042.6
ANXA2	0.000222835	ENST00000451270.7	0.0210219	0.390622	0.441364	1.1299	53271.2	56815.3
APH1A	3.04804e-06	ENST00000360244.8	0.000825741	0.50897	0.42364	0.832347	2629.38	1824.6
APH1A	3.04804e-06	ENST00000369109.8	0.000825741	0.49103	0.57636	1.17378	2534.63	2482.13
APOBEC3D	0.000225652	ENST00000216099.13	0.0213891	0.872095	0.422542	0.484513	92.9185	25.0522
APOBEC3D	0.000225652	ENST00000427494.6	0.0213891	0.127905	0.577458	4.51476	18.5741	28.459
APP	2.20928e-05	ENST00000346798.8	0.00313496	0.170219	0.228939	1.34497	3815.79	4839.38
APP	2.20928e-05	ENST00000357903.7	0.0589559	0.426898	0.372691	0.873022	9562.66	7788.13
APP	2.20928e-05	ENST00000439274.6	1	0.402884	0.39837	0.988795	9026.32	8308.93
ARHGAP12	5.24804e-08	ENST00000344936.7	1.6481e-05	0.0856758	0.213028	2.48644	163.54	290.572
ARHGAP12	5.24804e-08	ENST00000375245.8	0.882661	0.369049	0.338594	0.917477	701.144	468.923
ARHGAP12	5.24804e-08	ENST00000375250.9	0.0242847	0.328522	0.223068	0.679004	623.543	305.075
ARHGAP12	5.24804e-08	ENST00000396144.8	1	0.216753	0.22531	1.03948	410.311	309.831
ARMC8	2.81295e-05	ENST00000469044.6	0.00368666	0.257069	0.174342	0.678192	406.717	274.266
ARMC8	2.81295e-05	ENST00000470821.5	0.127489	0.273314	0.336653	1.23175	433.92	537.519
ARMC8	2.81295e-05	ENST00000471453.5	0.518074	0.247229	0.28724	1.16184	392.07	456.987
ARMC8	2.81295e-05	ENST00000491704.5	0.884516	0.222388	0.201765	0.907264	351.258	320.055
ASB1	0.000454273	ENST00000264607.9	0.14449	0.567263	0.502303	0.885485	1245.81	1066.53
ASB1	0.000454273	ENST00000409297.1	0.920932	0.178982	0.162616	0.908565	392.936	344.058
ASB1	0.000454273	ENST00000438264.5	0.0105605	0.253755	0.33508	1.32049	557.281	709.153
ATP5F1C	0.000927721	ENST00000335698.4	0.0547169	0.15428	0.196282	1.27225	2459.48	3087.5
ATP5F1C	0.000927721	ENST00000356708.12	0.0547169	0.84572	0.803718	0.950335	13530.2	12602.3
AURKA	0.0006441	ENST00000312783.10	0.550847	0.178554	0.159395	0.892702	2014.82	1609.6
AURKA	0.0006441	ENST00000347343.6	0.8645	0.160594	0.149157	0.928784	1807.5	1504.87
AURKA	0.0006441	ENST00000371356.6	1	0.365856	0.366052	1.00054	4120.63	3716.24
AURKA	0.0006441	ENST00000395913.7	0.00537408	0.136904	0.178757	1.30571	1538.06	1807.82
AURKA	0.0006441	ENST00000395914.5	0.858257	0.158093	0.146639	0.927549	1779.93	1478.29
AXL	2.4715e-06	ENST00000301178.9	0.000711697	0.789811	0.737786	0.934131	34127.7	29149.3
AXL	2.4715e-06	ENST00000359092.7	0.000711697	0.210189	0.262214	1.24751	9068.77	10336.2
B4GALT3	0.000375258	ENST00000319769.10	0.030168	0.830402	0.962551	1.15914	1538.57	1731.7
B4GALT3	0.000375258	ENST00000486938.1	0.030168	0.169598	0.0374489	0.220809	292.175	137.959
BAX	4.58642e-08	ENST00000293288.12	2.3957e-05	0.412467	0.533074	1.2924	2089.38	2603.23
BAX	4.58642e-08	ENST00000345358.12	2.3957e-05	0.587533	0.466926	0.794723	2983.33	2292.01
BCAM	5.26191e-05	ENST00000270233.12	0.00746123	0.713331	0.629945	0.883104	2727.5	1936.4
BCAM	5.26191e-05	ENST00000611077.5	0.00746123	0.286669	0.370055	1.29088	1091.17	1133.35
BCCIP	0.000698782	ENST00000278100.11	0.0157698	0.701715	0.75128	1.07064	4580.71	4596.82
BCCIP	0.000698782	ENST00000299130.7	0.278275	0.16945	0.143567	0.847254	1102.37	872.466
BCCIP	0.000698782	ENST00000368759.5	0.244919	0.128836	0.105153	0.816177	836.585	637.314
BEND7	0.00124438	ENST00000378605.3	0.60758	0.157363	0.12803	0.8136	352.778	221.639
BEND7	0.00124438	ENST00000440282.5	1	0.173696	0.172753	0.99457	381.265	299.822
BEND7	0.00124438	ENST00000466271.1	0.830101	0.29263	0.320496	1.09523	648.009	558.574
BEND7	0.00124438	ENST00000492675.1	0.112027	0.205533	0.149345	0.726623	453.156	264.032
BEND7	0.00124438	ENST00000649551.1	0.115034	0.170778	0.229376	1.34312	375.849	399.732
BRD4	0.000121744	ENST00000263377.6	0.812531	0.404496	0.387778	0.958669	3672.63	3122.42
BRD4	0.000121744	ENST00000371835.8	0.372436	0.18065	0.204384	1.13138	1637.29	1644.31
BRD4	0.000121744	ENST00000594841.5	0.301663	0.249554	0.278252	1.115	2262.69	2240.75
BRD4	0.000121744	ENST00000597315.5	0.0210219	0.1653	0.129585	0.783941	1499.8	1044.44
BTBD8	0.000822916	ENST00000342818.4	0.0589559	0.573113	0.0508863	0.0887893	23.0536	2.54443
BTBD8	0.000822916	ENST00000370378.5	0.974488	0.23697	0.285173	1.20341	11.3731	7.90353
BTBD8	0.000822916	ENST00000370382.7	0.173573	0.189917	0.663941	3.49595	10.1586	15.2728
BTD	0.00112319	ENST00000417015.3	0.194807	0.18504	0.115447	0.623904	174.004	92.3711
BTD	0.00112319	ENST00000643237.3	0.270701	0.174418	0.112257	0.643609	160.727	83.7541
BTD	0.00112319	ENST00000672065.1	0.66204	0.363764	0.423422	1.164	341.134	327.293
BTD	0.00112319	ENST00000673620.1	0.4147	0.276778	0.348874	1.26048	258.577	266.763
C15orf40	4.28886e-08	ENST00000451195.7	0.169617	0.247352	0.336787	1.36157	231.124	321.191
C15orf40	4.28886e-08	ENST00000508990.2	0.00971921	0.265485	0.154056	0.580282	244.245	145.312
C15orf40	4.28886e-08	ENST00000514272.2	0.00634727	0.135268	0.247231	1.82772	124.953	239.761
C15orf40	4.28886e-08	ENST00000565712.1	0.157283	0.351895	0.261925	0.744327	328.029	252.911
CALM1	0.000706922	ENST00000356978.9	0.0155141	0.186357	0.153862	0.825633	2872.62	2406.96
CALM1	0.000706922	ENST00000553630.1	0.846183	0.240783	0.252302	1.04784	3712.83	3961.82
CALM1	0.000706922	ENST00000663135.1	0.542046	0.57286	0.593836	1.03662	8847.76	9324.87
CAMK1	0.00145717	ENST00000256460.8	0.0729803	0.834693	0.766602	0.918424	1844.16	1616.56
CAMK1	0.00145717	ENST00000411972.1	0.0729803	0.165307	0.233398	1.4119	361.074	490.454
CASP9	0.00015613	ENST00000333868.10	1	0.330641	0.375994	1.13717	124.035	116.783
CASP9	0.00015613	ENST00000348549.9	0.805401	0.469527	0.599099	1.27596	179.865	190.576
CASP9	0.00015613	ENST00000447522.5	0.00429982	0.199832	0.0249064	0.124637	72.5833	22.2061
CASZ1	2.40839e-08	ENST00000344008.5	0.37149	0.190806	0.275165	1.44212	110.151	118.681
CASZ1	2.40839e-08	ENST00000377022.8	0.480662	0.195771	0.130505	0.666619	113.014	54.788
CASZ1	2.40839e-08	ENST00000478524.1	6.24037e-06	0.221872	0.0531978	0.239767	137.749	25.8332
CASZ1	2.40839e-08	ENST00000490176.1	0.812509	0.119273	0.158628	1.32996	68.2754	69.2907
CASZ1	2.40839e-08	ENST00000496432.6	0.225453	0.272278	0.382505	1.40483	158.943	165.282
CAV2	0.000740432	ENST00000222693.5	0.0467419	0.657566	0.524162	0.797124	893.051	710.45
CAV2	0.000740432	ENST00000495841.1	0.0467419	0.342434	0.475838	1.38958	465.969	647.179
CCDC102A	9.60955e-06	ENST00000258214.3	0.00224184	0.977077	0.765953	0.783923	505.38	402.239
CCDC102A	9.60955e-06	ENST00000569068.1	0.00224184	0.0229225	0.234047	10.2103	41.116	113.364
CCDC189	0.000316047	ENST00000535476.6	0.899211	0.24236	0.18342	0.756808	96.5892	59.4355
CCDC189	0.000316047	ENST00000537986.1	0.961175	0.290024	0.271789	0.937126	118.863	60.4977
CCDC189	0.000316047	ENST00000541260.5	0.828018	0.128058	0.240006	1.8742	54.5708	51.5473
CCDC189	0.000316047	ENST00000543610.6	0.00716225	0.202507	0.0228664	0.112916	79.6857	16.6968
CCDC189	0.000316047	ENST00000546006.5	0.646259	0.137051	0.281918	2.05703	50.9512	60.1808
CCDC97	2.81184e-05	ENST00000269967.4	0.988174	0.657175	0.669009	1.01801	1594.14	1280.36
CCDC97	2.81184e-05	ENST00000596882.1	0.0282615	0.233067	0.161911	0.694696	563.621	308.821
CCDC97	2.81184e-05	ENST00000600918.1	0.0368639	0.109757	0.16908	1.54049	268.393	320.41
CCRL2	0.00074037	ENST00000357392.4	0.09375	0.302237	0.0511582	0.169265	19.008	8.91619
CCRL2	0.00074037	ENST00000399036.4	0.179945	0.449603	0.844057	1.87734	33.8174	84.7946
CCRL2	0.00074037	ENST00000400880.3	0.612522	0.24816	0.104785	0.422247	14.5566	11.6397
CD164	0.000211605	ENST00000310786.10	0.0205284	0.832784	0.876799	1.05285	6809.74	7650.83
CD164	0.000211605	ENST00000324953.9	0.0205284	0.167216	0.123201	0.736777	1365.17	1058.33
CD59	1.36587e-05	ENST00000351554.8	0.00708156	0.261943	0.306061	1.16843	6460.14	6961
CD59	1.36587e-05	ENST00000395850.9	0.223788	0.260936	0.234052	0.89697	6442.3	5353.94
CD59	1.36587e-05	ENST00000426650.7	0.774289	0.140606	0.129304	0.919618	3474.4	2931.67
CD59	1.36587e-05	ENST00000642928.2	0.150216	0.137987	0.115426	0.836501	3397.41	2617.33
CD59	1.36587e-05	ENST00000651485.1	0.617018	0.198527	0.215156	1.08376	4902.79	4905.63
CDCA8	7.33654e-07	ENST00000327331.2	0.000275456	0.409656	0.29809	0.727659	1980.63	1333.81
CDCA8	7.33654e-07	ENST00000373055.6	0.000275456	0.590344	0.70191	1.18899	2870.04	3133.98
CDIN1	7.20581e-06	ENST00000566621.6	0.00161747	0.472942	0.260559	0.550931	190.591	123.754
CDIN1	7.20581e-06	ENST00000567573.5	1	0.220077	0.232284	1.05547	89.9678	107.991
CDIN1	7.20581e-06	ENST00000647059.1	0.00451625	0.306981	0.507157	1.65208	123.31	243.089
CDK11B	1.87769e-06	ENST00000340677.9	0.701189	0.133832	0.195491	1.46072	287.537	395.727
CDK11B	1.87769e-06	ENST00000341028.8	0.000275456	0.153253	0.0226046	0.147498	330.524	98.1145
CDK11B	1.87769e-06	ENST00000407249.7	0.980601	0.334285	0.349414	1.04526	702.715	688.005
CDK11B	1.87769e-06	ENST00000611150.3	0.293682	0.189014	0.301429	1.59475	396.791	596.675
CDK11B	1.87769e-06	ENST00000615951.4	0.636401	0.189616	0.131061	0.691191	395.356	249.507
CDK19	0.000702663	ENST00000323817.7	0.593548	0.335789	0.264227	0.786884	171.265	163.716
CDK19	0.000702663	ENST00000368911.8	0.239304	0.286481	0.193402	0.675094	145.559	115.598
CDK19	0.000702663	ENST00000413605.6	0.0836435	0.12511	0.229175	1.83178	62.5788	137.072
CDK19	0.000702663	ENST00000457688.5	0.719265	0.25262	0.313197	1.23979	132.866	193.419
CDK2	1.69103e-08	ENST00000266970.9	0.940667	0.767347	0.756464	0.985817	4630.46	4044.9
CDK2	1.69103e-08	ENST00000354056.4	0.000228022	0.0894482	0.144257	1.61274	535.162	773.267
CDK2	1.69103e-08	ENST00000554545.1	0.0104006	0.143204	0.0992791	0.693268	863.655	527.86
CDKL5	4.17697e-08	ENST00000463994.4	1.44157e-06	0.246076	0.0184362	0.0749207	95.1114	7.68689
CDKL5	4.17697e-08	ENST00000623535.2	0.99241	0.201209	0.18654	0.927098	73.8826	44.1657
CDKL5	4.17697e-08	ENST00000623610.1	0.31202	0.281022	0.433228	1.54162	106.068	106.448
CDKL5	4.17697e-08	ENST00000674046.1	0.753689	0.271693	0.361795	1.33163	101.654	86.1122
CENPO	5.4009e-06	ENST00000260662.2	0.930344	0.18618	0.169734	0.911665	754.186	724.122
CENPO	5.4009e-06	ENST00000380834.7	0.616202	0.356959	0.319929	0.896263	1455.93	1374.65
CENPO	5.4009e-06	ENST00000395845.2	0.000472976	0.0905777	0.160028	1.76674	376.571	685.53
CENPO	5.4009e-06	ENST00000473706.5	0.616956	0.145756	0.172207	1.18148	591.089	735.081
CENPO	5.4009e-06	ENST00000498362.1	0.320449	0.220528	0.178103	0.807621	891.728	762.933
CEP131	0.00106555	ENST00000269392.8	0.808657	0.245732	0.317941	1.29385	140.965	160.882
CEP131	0.00106555	ENST00000374782.7	0.568836	0.346104	0.458136	1.3237	199.331	232.572
CEP131	0.00106555	ENST00000450824.7	0.0124356	0.291571	0.118235	0.405511	167.254	70.2724
CEP131	0.00106555	ENST00000570817.5	1	0.116593	0.105688	0.90647	68.1031	48.7352
CIZ1	3.64907e-05	ENST00000372938.10	0.92332	0.209147	0.22244	1.06356	1329.81	1402.11
CIZ1	3.64907e-05	ENST00000393608.5	0.0102898	0.421827	0.356073	0.84412	2664.16	2245.46
CIZ1	3.64907e-05	ENST00000471773.5	0.999382	0.165679	0.159377	0.961965	1042.65	1007.45
CIZ1	3.64907e-05	ENST00000474442.1	0.00627895	0.203347	0.26211	1.28898	1284.32	1651.88
CMC1	3.31386e-07	ENST00000396610.6	0.0213891	0.304908	0.169156	0.554775	356.137	211.984
CMC1	3.31386e-07	ENST00000418849.2	0.000114575	0.262235	0.476178	1.81584	310.951	610.962
CMC1	3.31386e-07	ENST00000423894.5	0.539741	0.432857	0.354666	0.819362	515.899	456.175
COA1	0.000513157	ENST00000223336.10	0.0359724	0.619508	0.534814	0.863289	2160.28	1584.99
COA1	0.000513157	ENST00000438444.5	0.0359724	0.380492	0.465186	1.22259	1324.67	1370.34
COMMD4	0.00105731	ENST00000267935.13	0.05888	0.852688	0.90035	1.0559	6066.62	5458.3
COMMD4	0.00105731	ENST00000338995.10	0.05888	0.147312	0.0996501	0.676455	1051.38	604.925
COX10	0.000435107	ENST00000261643.8	0.0322282	0.79176	0.692291	0.87437	1017.57	935.363
COX10	0.000435107	ENST00000429152.6	0.0322282	0.20824	0.307709	1.47767	267.689	413.677
CREB5	2.1755e-07	ENST00000357727.7	0.825383	0.440057	0.332608	0.75583	373.326	362.328
CREB5	2.1755e-07	ENST00000396298.6	0.988174	0.222126	0.198624	0.894195	181.458	207.069
CREB5	2.1755e-07	ENST00000468813.1	4.04517e-06	0.0205284	0.28248	13.7604	105.673	323.99
CREB5	2.1755e-07	ENST00000482692.1	0.58689	0.317289	0.186288	0.587125	264.047	190.827
CSF3	0.000197356	ENST00000225474.6	0.240859	0.287016	0.732758	2.55302	33.5768	69.7097
CSF3	0.000197356	ENST00000394149.8	0.00359551	0.568124	0.0338144	0.0595194	41.8413	21.8342
CSF3	0.000197356	ENST00000582798.1	0.925122	0.14486	0.233428	1.61141	9.07305	12.6333
CSNK1G3	0.000278046	ENST00000345990.8	0.975004	0.292248	0.308598	1.05595	859.022	947.329
CSNK1G3	0.000278046	ENST00000361991.6	0.645511	0.161738	0.193332	1.19534	474.223	586.823
CSNK1G3	0.000278046	ENST00000510842.6	0.750799	0.229161	0.260365	1.13616	672.943	792.284
CSNK1G3	0.000278046	ENST00000515322.2	1	0.141915	0.135528	0.954993	415.847	405.763
CSNK1G3	0.000278046	ENST00000521364.5	0.00233096	0.174938	0.102177	0.584077	516.512	316.663
CTNND1	2.1323e-06	ENST00000358694.10	0.00448739	0.382004	0.277544	0.726548	1183.27	709.136
CTNND1	2.1323e-06	ENST00000529986.5	0.00313521	0.187005	0.282887	1.51272	575.612	726.979
CTNND1	2.1323e-06	ENST00000673683.1	1	0.43099	0.439569	1.0199	1349.48	1129.1
CTTN	1.75071e-09	ENST00000301843.13	1.37091e-06	0.762901	0.641499	0.840869	2641.23	1763.35
CTTN	1.75071e-09	ENST00000376561.7	1.37091e-06	0.237099	0.358501	1.51203	818.783	987.78
CUL7	0.00125691	ENST00000265348.9	0.276007	0.667938	0.828364	1.24018	718.529	618.047
CUL7	0.00125691	ENST00000478630.1	0.0444113	0.161938	0.0430601	0.265904	167.616	49.9489
CUL7	0.00125691	ENST00000535468.1	0.88449	0.170123	0.128576	0.755782	177.33	93.0034
CXCL12	2.91109e-10	ENST00000343575.10	1.28516e-07	0.423838	0.534006	1.25993	1640.81	2053.69
CXCL12	2.91109e-10	ENST00000374426.6	0.00477345	0.188686	0.135928	0.720393	729.763	523.284
CXCL12	2.91109e-10	ENST00000374429.6	0.0340019	0.387475	0.330066	0.851838	1499.82	1267.14
CYTH2	0.000663299	ENST00000391881.7	0.0186894	0.567657	0.646531	1.13895	1391.48	1717.97
CYTH2	0.000663299	ENST00000452733.7	0.0975379	0.236334	0.182203	0.770956	576.378	480.221
CYTH2	0.000663299	ENST00000641098.1	0.732428	0.196009	0.171266	0.873763	481.391	452.539
DCP2	9.56852e-13	ENST00000389063.3	0.0130909	0.301506	0.398543	1.32184	392.692	782.585
DCP2	9.56852e-13	ENST00000504961.1	4.47181e-09	0.360255	0.193101	0.536013	471.277	376.546
DCP2	9.56852e-13	ENST00000512751.5	0.845723	0.148855	0.127192	0.854474	198.321	247.832
DCP2	9.56852e-13	ENST00000515408.5	0.00607008	0.189384	0.281163	1.48462	245.38	551.135
DCTD	0.000460041	ENST00000357067.7	0.039998	0.632619	0.675627	1.06798	5440.6	5602.85
DCTD	0.000460041	ENST00000510307.5	0.0319544	0.169471	0.136454	0.805174	1453.68	1125.44
DCTD	0.000460041	ENST00000510370.5	0.915436	0.19791	0.187919	0.949517	1699.14	1562.11
DENND1A	4.68866e-08	ENST00000373620.7	0.00423472	0.0999135	0.16662	1.66764	158.239	250.303
DENND1A	4.68866e-08	ENST00000373624.6	0.000290851	0.339555	0.234523	0.690677	541.25	353.968
DENND1A	4.68866e-08	ENST00000394215.6	1	0.386118	0.382706	0.991164	616.447	580.167
DENND1A	4.68866e-08	ENST00000474676.1	0.351967	0.174413	0.216151	1.2393	278.565	326.314
DENND5B	0.000661428	ENST00000354285.8	0.986736	0.107198	0.0994007	0.927261	158.256	185.299
DENND5B	0.000661428	ENST00000389082.10	0.0080443	0.352588	0.436066	1.23676	525.236	821.07
DENND5B	0.000661428	ENST00000536562.5	0.200941	0.266242	0.218246	0.819729	396.622	408.305
DENND5B	0.000661428	ENST00000546299.1	0.71807	0.273971	0.246287	0.89895	407.451	461.672
DEPDC1	1.85766e-10	ENST00000370966.9	2.30252e-06	0.327591	0.444563	1.35707	1161.57	1625.5
DEPDC1	1.85766e-10	ENST00000456315.7	2.57523e-05	0.291847	0.196914	0.674715	1034.54	710.996
DEPDC1	1.85766e-10	ENST00000525124.1	0.853705	0.380561	0.358523	0.94209	1359.98	1298.3
DGUOK	2.08168e-28	ENST00000264093.9	0.122372	0.367563	0.31897	0.867798	2215.81	1737.15
DGUOK	2.08168e-28	ENST00000418996.5	7.5097e-19	0.386161	0.563047	1.45806	2325.99	3075.57
DGUOK	2.08168e-28	ENST00000629438.2	4.38269e-17	0.246277	0.117982	0.479065	1481.09	646.48
DHTKD1	3.22972e-05	ENST00000263035.9	0.00516452	0.93647	0.829126	0.885374	1684.47	1306.39
DHTKD1	3.22972e-05	ENST00000479283.1	0.00516452	0.0635302	0.170874	2.68965	126.925	261.313
DHX33	0.00123622	ENST00000225296.8	0.858257	0.778944	0.75937	0.974872	2419.15	2299.96
DHX33	0.00123622	ENST00000574023.1	0.055094	0.104549	0.14806	1.41618	326.752	443.685
DHX33	0.00123622	ENST00000575153.5	0.490203	0.116508	0.0925697	0.794537	358.431	276.803
DLG1	0.00011917	ENST00000392380.6	0.0155141	0.192309	0.270745	1.40787	754.585	1103.76
DLG1	0.00011917	ENST00000448528.6	0.830231	0.216599	0.241243	1.11378	842.032	980.176
DLG1	0.00011917	ENST00000450955.5	0.293566	0.353127	0.298292	0.844716	1359.56	1206.63
DLG1	0.00011917	ENST00000657381.1	0.28573	0.237966	0.189719	0.797256	914.258	764.333
DMWD	0.000738373	ENST00000270223.7	0.0336516	0.279219	0.218222	0.781545	815.032	509.924
DMWD	0.000738373	ENST00000377735.7	1	0.370964	0.363337	0.979441	1079.31	849.784
DMWD	0.000738373	ENST00000598237.1	0.591585	0.178415	0.206354	1.15659	517.057	483.503
DMWD	0.000738373	ENST00000602469.1	0.240328	0.171402	0.212087	1.23736	496.865	497.098
DNAAF3	0.000326838	ENST00000391720.8	0.48085	0.109985	0.276112	2.51046	15.3951	29.5868
DNAAF3	0.000326838	ENST00000455045.5	0.320579	0.14208	0.0363229	0.255652	20.4346	6.23142
DNAAF3	0.000326838	ENST00000524407.7	0.0264148	0.265291	0.0442993	0.166984	45.2348	9.73869
DNAAF3	0.000326838	ENST00000527292.5	0.937167	0.14017	0.232716	1.66025	23.0853	26.3866
DNAAF3	0.000326838	ENST00000587789.2	1	0.342475	0.41055	1.19877	59.2573	47.7503
DNMT3A	0.000317906	ENST00000264709.7	0.965026	0.367355	0.394689	1.07441	251.074	202.709
DNMT3A	0.000317906	ENST00000380746.8	0.0423395	0.485806	0.360432	0.741925	332.162	189.633
DNMT3A	0.000317906	ENST00000406659.3	0.0520928	0.146839	0.244879	1.66767	98.5915	126.708
DUXAP9	0.000693379	ENST00000549484.5	0.157158	0.178438	0.260327	1.45892	132.021	191.185
DUXAP9	0.000693379	ENST00000610585.4	1	0.162145	0.156085	0.962629	116.032	115.328
DUXAP9	0.000693379	ENST00000619210.1	0.823507	0.262063	0.301965	1.15226	190.4	219.512
DUXAP9	0.000693379	ENST00000621361.4	0.0154512	0.254752	0.149392	0.586421	183.926	108.225
DUXAP9	0.000693379	ENST00000644980.1	1	0.142601	0.13223	0.927269	102.412	96.9677
DVL3	1.67027e-06	ENST00000313143.9	0.000535905	0.795282	0.701275	0.881795	2293.47	1771.34
DVL3	1.67027e-06	ENST00000478247.1	0.000535905	0.204718	0.298725	1.4592	588.044	755.269
DYM	0.00143082	ENST00000269445.10	0.231816	0.286209	0.203831	0.712177	434.679	392.476
DYM	0.00143082	ENST00000442713.6	0.830231	0.382546	0.335213	0.876268	583.632	652.163
DYM	0.00143082	ENST00000583353.1	0.485061	0.132644	0.182641	1.37692	225.567	349.22
DYM	0.00143082	ENST00000584983.5	0.16674	0.198601	0.278315	1.40138	306.592	536.939
EIF4A2	2.19599e-11	ENST00000323963.10	7.11413e-07	0.328714	0.430296	1.30903	5834.25	7949.08
EIF4A2	2.19599e-11	ENST00000425053.5	0.00516452	0.219522	0.163937	0.746793	3886.2	2986.39
EIF4A2	2.19599e-11	ENST00000440191.6	0.781612	0.169874	0.187607	1.10439	3005.89	3421.74
EIF4A2	2.19599e-11	ENST00000494445.1	0.0032006	0.28189	0.21816	0.773919	4994.44	3986.86
ELK1	0.000157217	ENST00000247161.7	0.0168189	0.414589	0.303651	0.732416	789.187	565.955
ELK1	0.000157217	ENST00000376983.8	0.0168189	0.585411	0.696349	1.1895	1114.46	1312.14
EPDR1	0.00019071	ENST00000199448.9	0.0190139	0.74609	0.96693	1.296	143.01	183.433
EPDR1	0.00019071	ENST00000425345.1	0.0190139	0.25391	0.0330702	0.130243	47.1129	12.3417
ERCC1	1.33122e-05	ENST00000013807.9	0.501348	0.293238	0.266535	0.908937	1725.56	1340.44
ERCC1	1.33122e-05	ENST00000300853.8	0.237068	0.32536	0.2895	0.889783	1916.12	1456.7
ERCC1	1.33122e-05	ENST00000340192.11	0.000276235	0.226398	0.29241	1.29158	1332.38	1480.71
ERCC1	1.33122e-05	ENST00000589165.5	1	0.155004	0.151555	0.977751	908.982	760.691
ERCC2	1.07427e-05	ENST00000391942.6	0.480662	0.198152	0.244322	1.233	633.015	792.037
ERCC2	1.07427e-05	ENST00000391945.10	0.0015845	0.634269	0.502418	0.792121	2042.87	1632.85
ERCC2	1.07427e-05	ENST00000586131.6	0.0221776	0.167578	0.25326	1.51129	558.437	823.485
ETFRF1	0.000901011	ENST00000381356.9	0.829878	0.622361	0.454184	0.729776	218.07	160.237
ETFRF1	0.000901011	ENST00000555151.5	1	0.346977	0.324151	0.934217	117.748	109.156
ETFRF1	0.000901011	ENST00000556351.6	0.0210219	0.030662	0.221664	7.2293	38.7154	72.3359
EXOC7	5.65325e-26	ENST00000332065.9	1.63198e-22	0.359161	0.554647	1.54429	1310.98	1992.03
EXOC7	5.65325e-26	ENST00000589210.6	7.1784e-12	0.403535	0.267137	0.661993	1470.8	954.086
EXOC7	5.65325e-26	ENST00000634349.1	0.00897656	0.237305	0.178216	0.751002	863.46	642.477
EYA2	0.000103042	ENST00000327619.10	0.0123258	0.820475	0.987409	1.20346	111.508	137.681
EYA2	0.000103042	ENST00000357410.7	0.0123258	0.179525	0.0125908	0.0701337	20.8247	1.77346
FAIM	0.00126379	ENST00000393035.6	0.0669371	0.626762	0.767143	1.22398	840.291	1157.34
FAIM	0.00126379	ENST00000464668.5	0.0669371	0.373238	0.232857	0.623883	497.061	362.396
FAM104B	0.000434348	ENST00000332132.8	0.00448739	0.1502	0.022575	0.150299	80.6819	26.4668
FAM104B	0.000434348	ENST00000358460.8	0.76687	0.380294	0.47459	1.24795	211.932	232.772
FAM104B	0.000434348	ENST00000477847.6	1	0.145873	0.139409	0.955693	79.9844	62.8216
FAM104B	0.000434348	ENST00000489298.1	0.99241	0.323633	0.363426	1.12296	175.96	174.405
FAM160B2	0.000384882	ENST00000289921.8	0.175569	0.362571	0.473596	1.30622	264.393	278.208
FAM160B2	0.000384882	ENST00000427751.5	0.974488	0.119927	0.102844	0.857552	91.2946	58.5501
FAM160B2	0.000384882	ENST00000450006.7	0.05888	0.178014	0.0874643	0.491333	130.6	53.8019
FAM160B2	0.000384882	ENST00000462914.3	0.480079	0.117759	0.175279	1.48845	84.8174	100.735
FAM160B2	0.000384882	ENST00000496599.3	0.543157	0.221729	0.160817	0.725289	160.696	92.8476
FAM3A	0.000247449	ENST00000359889.9	0.103719	0.319443	0.157872	0.494212	139.969	39.3943
FAM3A	0.000247449	ENST00000419205.5	0.934992	0.153359	0.220376	1.43699	61.0083	43.8927
FAM3A	0.000247449	ENST00000426266.5	0.134799	0.156481	0.0392748	0.250988	63.7919	27.7783
FAM3A	0.000247449	ENST00000612856.4	0.157863	0.168827	0.364069	2.15647	69.5094	73.707
FAM3A	0.000247449	ENST00000621967.4	1	0.201891	0.218408	1.08181	83.8395	43.8003
FBXO22	2.00893e-07	ENST00000453211.6	1	0.123571	0.125841	1.01837	296.681	281.652
FBXO22	2.00893e-07	ENST00000564220.1	4.16626e-06	0.156596	0.0672978	0.429755	378.946	159.552
FBXO22	2.00893e-07	ENST00000569022.1	0.615661	0.44411	0.489575	1.10237	1080.59	1095.59
FBXO22	2.00893e-07	ENST00000569054.5	0.591423	0.275724	0.317286	1.15074	671.743	710.419
FLNA	6.57757e-15	ENST00000360319.9	1.16159e-11	0.0697507	0.133033	1.90727	1679.58	2875.57
FLNA	6.57757e-15	ENST00000369856.8	1.16159e-11	0.930249	0.866967	0.931973	22574.1	18808.1
FLNB	1.7325e-43	ENST00000295956.9	2.7411e-21	0.293355	0.459184	1.56529	4002.64	6169.91
FLNB	1.7325e-43	ENST00000358537.7	2.21578e-34	0.344488	0.159665	0.463483	4714.91	2136.48
FLNB	1.7325e-43	ENST00000490882.5	0.609634	0.362157	0.381152	1.05245	4953	5114.83
FOXK2	3.36573e-05	ENST00000335255.10	0.92335	0.452629	0.421044	0.930219	1522.75	1318.05
FOXK2	3.36573e-05	ENST00000473637.6	0.988174	0.165354	0.176686	1.06853	561.672	547.775
FOXK2	3.36573e-05	ENST00000526383.2	0.00381434	0.138757	0.236031	1.70104	481.295	739.962
FOXK2	3.36573e-05	ENST00000531030.5	0.0774937	0.243261	0.16624	0.683382	827.306	514.354
FSTL3	0.00104373	ENST00000166139.9	0.0584723	0.411972	0.495109	1.2018	939.081	1338.32
FSTL3	0.00104373	ENST00000592947.5	0.0584723	0.588028	0.504891	0.858617	1337.46	1361.67
FTH1	0.000399118	ENST00000532829.5	0.0306509	0.265531	0.211731	0.797385	19214.9	14389.3
FTH1	0.000399118	ENST00000620041.4	0.0306509	0.734469	0.788269	1.07325	53328.6	53507.7
G3BP1	6.36064e-10	ENST00000356245.8	9.59557e-08	0.159963	0.0846028	0.528891	1361.06	701.571
G3BP1	6.36064e-10	ENST00000394123.7	0.93646	0.286748	0.301202	1.05041	2435.19	2464.95
G3BP1	6.36064e-10	ENST00000522666.1	0.040208	0.55329	0.614195	1.11008	4701.77	5028.86
GBA2	0.00104138	ENST00000378088.1	0.937167	0.28247	0.300619	1.06425	628.491	516.251
GBA2	0.00104138	ENST00000378103.7	0.0166479	0.289498	0.215176	0.743273	645.146	369.139
GBA2	0.00104138	ENST00000488292.1	0.237698	0.236682	0.287617	1.2152	528.439	493.354
GBA2	0.00104138	ENST00000489025.1	1	0.19135	0.196588	1.02737	425.934	337.878
GFRA1	0.000841594	ENST00000369234.4	0.885297	0.158042	0.0898356	0.568429	35.896	28.1618
GFRA1	0.000841594	ENST00000369236.5	0.416729	0.816971	0.685521	0.8391	192.774	153.8
GFRA1	0.000841594	ENST00000490345.1	0.0273303	0.0249867	0.224644	8.99052	7.3803	50.4389
GLCE	0.000330531	ENST00000261858.7	0.34489	0.406687	0.487237	1.19806	1005.64	1533.82
GLCE	0.000330531	ENST00000559420.2	0.490203	0.165211	0.220248	1.33313	417.307	700.451
GLCE	0.000330531	ENST00000559798.2	0.0102698	0.428102	0.292515	0.683284	1054.63	906.776
GLI4	0.00125046	ENST00000340042.2	0.029125	0.244899	0.387669	1.58298	214.372	238.121
GLI4	0.00125046	ENST00000519876.1	0.175635	0.521286	0.402706	0.772524	445.501	252.072
GLI4	0.00125046	ENST00000522033.1	0.978168	0.233815	0.209625	0.896542	198.443	126.822
GLRX5	1.63705e-05	ENST00000331334.5	0.0032006	0.352199	0.427973	1.21515	2308.5	2643.66
GLRX5	1.63705e-05	ENST00000553672.1	0.0032006	0.647801	0.572027	0.883028	4253.02	3525.45
GNAL	4.04515e-12	ENST00000334049.11	0.599483	0.487844	0.473876	0.971368	761.36	668.092
GNAL	4.04515e-12	ENST00000585642.5	5.60121e-09	0.0118653	0.257978	21.7422	81.8016	359.301
GNAL	4.04515e-12	ENST00000590228.1	0.0301448	0.500291	0.268146	0.53598	785.13	384.529
GNL1	0.000247287	ENST00000433809.1	0.00511301	0.403213	0.0767941	0.190456	229.316	74.4164
GNL1	0.000247287	ENST00000462708.1	0.36985	0.423369	0.687021	1.62275	209.212	161.665
GNL1	0.000247287	ENST00000487166.1	0.975507	0.173418	0.236185	1.36194	70.7037	48.5041
GOLGA2P10	1.53039e-07	ENST00000550961.6	0.0120997	0.289648	0.0272016	0.0939127	112.895	12.3994
GOLGA2P10	1.53039e-07	ENST00000618004.4	0.292381	0.673753	0.623891	0.925994	269.675	177.267
GOLGA2P10	1.53039e-07	ENST00000618267.4	0.00448739	0.0365996	0.348907	9.53308	58.9148	112.425
GOSR1	0.000632462	ENST00000225724.9	0.952046	0.466742	0.441738	0.946428	1317.06	1110.59
GOSR1	0.000632462	ENST00000414833.2	0.0758778	0.350245	0.441009	1.25914	990.662	1114.99
GOSR1	0.000632462	ENST00000467337.6	0.0800631	0.183013	0.117253	0.640682	528.96	292.024
GPI	0.000341183	ENST00000356487.11	0.0439714	0.497081	0.451254	0.907806	8417.36	6970.86
GPI	0.000341183	ENST00000586425.2	0.804872	0.393802	0.411179	1.04413	6670.78	6363.9
GPI	0.000341183	ENST00000647446.1	0.0702896	0.109117	0.137567	1.26073	1845.67	2116.3
H2AX	6.02075e-05	ENST00000375167.1	0.00799508	0.516165	0.452891	0.877416	7551.06	6233.11
H2AX	6.02075e-05	ENST00000530167.1	0.00799508	0.483835	0.547109	1.13078	7066.06	7512.7
H2AZ2	0.00119662	ENST00000222690.10	0.996754	0.25842	0.251904	0.974784	5264.76	4774.86
H2AZ2	0.00119662	ENST00000308153.9	1	0.242281	0.241649	0.997388	4932.17	4592.14
H2AZ2	0.00119662	ENST00000349299.7	0.0718785	0.230579	0.189134	0.820258	4695.84	3595.12
H2AZ2	0.00119662	ENST00000350771.7	0.0559915	0.26872	0.317313	1.18083	5479.36	6065.95
HAUS5	1.878e-05	ENST00000203166.10	0.000742502	0.538801	0.358326	0.665044	603.976	341.066
HAUS5	1.878e-05	ENST00000585968.5	0.191193	0.252609	0.350871	1.38899	283.671	334.977
HAUS5	1.878e-05	ENST00000590994.1	0.271585	0.208591	0.290803	1.39413	230.5	282.674
HMGXB4	0.000603888	ENST00000216106.6	0.0314549	0.453791	0.549269	1.2104	1030.92	1139.52
HMGXB4	0.000603888	ENST00000418170.5	0.826809	0.310001	0.280429	0.904609	704.076	580.157
HMGXB4	0.000603888	ENST00000455359.5	0.0984892	0.236208	0.170302	0.720983	534.891	353.295
HNRNPC	1.1788e-06	ENST00000336053.10	0.0915421	0.177375	0.139911	0.788783	3734.13	3316.53
HNRNPC	1.1788e-06	ENST00000554455.5	0.247564	0.520341	0.478237	0.919083	10996.7	11426.7
HNRNPC	1.1788e-06	ENST00000557201.5	0.000248332	0.302283	0.381853	1.26323	6387.35	9061.94
HS1BP3	9.51292e-05	ENST00000304031.8	0.00728139	0.692804	0.567649	0.81935	673.188	325.69
HS1BP3	9.51292e-05	ENST00000402541.5	0.188225	0.0802377	0.132696	1.65379	75.4614	74.7527
HS1BP3	9.51292e-05	ENST00000406618.3	0.09375	0.081391	0.142195	1.74707	77.0545	80.3919
HS1BP3	9.51292e-05	ENST00000458740.5	0.997339	0.145567	0.157459	1.08169	140.225	89.7286
HSPA12A	1.83924e-07	ENST00000453491.3	0.981694	0.269214	0.291935	1.0844	85.5464	87.9607
HSPA12A	1.83924e-07	ENST00000481291.2	1	0.205082	0.207945	1.01396	64.8314	61.1018
HSPA12A	1.83924e-07	ENST00000674223.1	6.82485e-05	0.295033	0.0601066	0.203728	94.5996	26.092
HSPA12A	1.83924e-07	ENST00000674291.1	0.30091	0.0515259	0.137093	2.66065	22.6081	41.0244
HSPA12A	1.83924e-07	ENST00000674375.1	0.0377379	0.0547525	0.180718	3.30063	15.3149	56.6653
HSPA12A	1.83924e-07	ENST00000674468.1	1	0.124392	0.122203	0.982397	37.9883	34.9366
IBA57	8.18836e-05	ENST00000366711.4	0.0444113	0.796721	0.664503	0.834047	363.932	348.501
IBA57	8.18836e-05	ENST00000484749.5	1	0.108576	0.103553	0.953738	46.859	51.7957
IBA57	8.18836e-05	ENST00000546123.2	0.0032006	0.0947027	0.231944	2.44918	43.7037	122.034
ICAM2	0.000955274	ENST00000581417.5	0.0559915	0.0170522	0.216954	12.7229	1.68763	15.7983
ICAM2	0.000955274	ENST00000583186.1	0.0559915	0.982948	0.783046	0.79663	68.3169	66.7577
ICMT	0.000794353	ENST00000343813.10	0.0489229	0.39246	0.334303	0.851814	1965.77	1381.68
ICMT	0.000794353	ENST00000489498.5	0.0489229	0.60754	0.665697	1.09573	3048.45	2755.24
IFI16	2.3113e-13	ENST00000368131.8	5.7591e-07	0.176512	0.378329	2.14336	324.657	646.993
IFI16	2.3113e-13	ENST00000368132.7	6.62906e-10	0.607294	0.342552	0.564063	1144.46	582.937
IFI16	2.3113e-13	ENST00000448393.6	0.483117	0.216193	0.279118	1.29106	405.85	467.664
IFIH1	6.78508e-07	ENST00000421365.2	0.624131	0.221998	0.330468	1.48861	42.4844	69.134
IFIH1	6.78508e-07	ENST00000649554.1	0.000843831	0.0198724	0.217425	10.9411	5.33441	47.4165
IFIH1	6.78508e-07	ENST00000649979.2	0.00837465	0.75813	0.452107	0.596344	151.734	94.4646
IFITM1	6.03464e-05	ENST00000328221.5	1	0.127166	0.147492	1.15984	145.09	110.857
IFITM1	6.03464e-05	ENST00000408968.4	0.540765	0.577826	0.823833	1.42575	848.615	797.314
IFITM1	6.03464e-05	ENST00000525554.1	0.00205741	0.295008	0.0286741	0.0971978	433.8	202.362
IFT22	8.14596e-06	ENST00000315322.10	0.0506139	0.127057	0.188574	1.48417	261.131	235.485
IFT22	8.14596e-06	ENST00000422177.5	0.253125	0.276168	0.335599	1.2152	572.946	421.223
IFT22	8.14596e-06	ENST00000437644.2	0.774707	0.224301	0.196708	0.876979	465.289	248.137
IFT22	8.14596e-06	ENST00000498704.6	0.00862834	0.372473	0.279119	0.749368	777.458	352.609
IFT74	5.98853e-08	ENST00000429045.6	0.96592	0.296026	0.285187	0.963386	87.0682	98.0171
IFT74	5.98853e-08	ENST00000443698.5	3.5336e-06	0.0275973	0.315687	11.439	23.4126	111.504
IFT74	5.98853e-08	ENST00000517444.5	0.283092	0.357532	0.1861	0.520514	105.526	68.6208
IFT74	5.98853e-08	ENST00000648373.1	0.659003	0.318845	0.213026	0.668117	95.4194	71.7281
IKBIP	1.67219e-05	ENST00000299157.5	0.473023	0.537334	0.49926	0.929142	1971.65	1945.68
IKBIP	1.67219e-05	ENST00000342502.6	0.580278	0.315187	0.284384	0.90227	1155.99	1104.52
IKBIP	1.67219e-05	ENST00000393042.3	0.000818745	0.147479	0.216356	1.46703	538.841	850.893
IL1RAP	7.14801e-05	ENST00000072516.7	0.859634	0.190907	0.233607	1.22367	176.646	298.522
IL1RAP	7.14801e-05	ENST00000412080.1	1	0.128796	0.113193	0.878856	119.134	142.309
IL1RAP	7.14801e-05	ENST00000422485.5	0.943335	0.245571	0.207165	0.843607	230.434	269.011
IL1RAP	7.14801e-05	ENST00000447382.6	0.00134341	0.0377513	0.171866	4.55259	60.934	211.669
IL1RAP	7.14801e-05	ENST00000465496.1	0.76609	0.273769	0.209363	0.764741	256.15	278.54
IL1RAP	7.14801e-05	ENST00000476929.1	0.461699	0.123205	0.0648055	0.525996	112.418	75.8912
ILF3	0.000925287	ENST00000407004.7	0.314852	0.383652	0.354202	0.923237	6201.59	4997.2
ILF3	0.000925287	ENST00000449870.5	0.930344	0.196999	0.187797	0.953289	3180.62	2637.13
ILF3	0.000925287	ENST00000589998.5	1	0.222712	0.217535	0.976754	3602.48	3058.08
ILF3	0.000925287	ENST00000590261.5	0.00922707	0.196636	0.240466	1.2229	3173.8	3399.77
INF2	1.26719e-09	ENST00000252527.8	0.000708182	0.320489	0.230591	0.719497	751.099	459.378
INF2	1.26719e-09	ENST00000330634.11	0.157158	0.200755	0.155167	0.772917	469.912	307.616
INF2	1.26719e-09	ENST00000398337.8	1.60388e-07	0.478756	0.614242	1.283	1124.39	1225.07
INO80E	1.64036e-20	ENST00000304516.11	1.35765e-05	0.0888482	0.174216	1.96083	383.72	705.144
INO80E	1.64036e-20	ENST00000563197.6	5.10061e-18	0.828898	0.639491	0.771495	3653.26	2609.11
INO80E	1.64036e-20	ENST00000620599.4	1.26219e-08	0.0822536	0.186293	2.26486	362.823	767.516
IPO5P1	6.892e-05	ENST00000593576.1	0.00897656	0.656756	0.932786	1.42029	216.119	160.46
IPO5P1	6.892e-05	ENST00000600039.1	0.00897656	0.343244	0.0672143	0.195821	128.06	15.2515
IRX4	5.17548e-05	ENST00000231357.7	0.810951	0.532239	0.541747	1.01786	47.8954	40.9896
IRX4	5.17548e-05	ENST00000505938.1	0.991803	0.157426	0.210263	1.33564	21.4646	25.7075
IRX4	5.17548e-05	ENST00000511126.1	0.0264148	0.292413	0.0174848	0.0597949	24.647	1.05569
IRX4	5.17548e-05	ENST00000622814.4	0.0895723	0.0179222	0.230505	12.8614	2.45119	13.9821
ITGAE	0.00087878	ENST00000570360.1	0.0527664	0.144558	0.0930256	0.643519	394.297	230.378
ITGAE	0.00087878	ENST00000572179.5	0.0527664	0.855442	0.906974	1.06024	2351.19	2262.64
ITGB1BP1	5.50829e-06	ENST00000464228.5	0.06628	0.38135	0.425567	1.11595	2260.91	2583.35
ITGB1BP1	5.50829e-06	ENST00000467606.5	1	0.204376	0.199638	0.976814	1216.28	1211.03
ITGB1BP1	5.50829e-06	ENST00000488451.5	0.967747	0.244779	0.253538	1.03578	1449.63	1534.53
ITGB1BP1	5.50829e-06	ENST00000490426.5	0.000351026	0.169494	0.121257	0.715403	1002.08	730.72
ITSN1	6.75604e-08	ENST00000399338.8	5.53164e-06	0.265045	0.408239	1.54026	492.845	590.876
ITSN1	6.75604e-08	ENST00000399349.5	0.330462	0.20087	0.154397	0.768643	371.199	221.274
ITSN1	6.75604e-08	ENST00000399352.5	0.0257781	0.534085	0.437363	0.818902	996.187	636.311
JADE1	0.00113212	ENST00000226319.11	0.97019	0.22412	0.250167	1.11622	283.581	293.259
JADE1	0.00113212	ENST00000511647.5	1	0.17612	0.170109	0.965866	216.784	189.805
JADE1	0.00113212	ENST00000610919.4	0.258298	0.337482	0.445012	1.31862	419.309	508.151
JADE1	0.00113212	ENST00000611140.4	0.0160626	0.262277	0.134712	0.513625	327.018	156.13
JPT2	0.00113545	ENST00000248098.8	0.0282615	0.357368	0.30373	0.849909	4014.7	2631.84
JPT2	0.00113545	ENST00000562684.5	0.253674	0.322463	0.360212	1.11706	3617.87	3122.96
JPT2	0.00113545	ENST00000566742.5	0.888838	0.320169	0.336058	1.04963	3604.87	2908.03
KCNC4	0.000350231	ENST00000412512.2	0.0071861	0.364049	0.503616	1.38337	370.923	514.06
KCNC4	0.000350231	ENST00000469655.5	0.316868	0.237949	0.170881	0.718139	234.142	171.705
KCNC4	0.000350231	ENST00000489935.1	1	0.194761	0.184952	0.949634	189.32	185.061
KCNC4	0.000350231	ENST00000636402.1	0.315959	0.203241	0.140552	0.691554	197.544	139.591
KCNQ1	0.000684507	ENST00000155840.12	0.490203	0.512934	0.248919	0.485285	47.9954	24.7782
KCNQ1	0.000684507	ENST00000335475.6	0.301663	0.119008	0.300535	2.52533	16.5788	30.3582
KCNQ1	0.000684507	ENST00000496887.6	0.069446	0.03806	0.231063	6.07102	7.60261	23.0447
KCNQ1	0.000684507	ENST00000646564.1	0.984226	0.329998	0.219483	0.665103	29.2204	20.9866
KCTD17	7.59609e-05	ENST00000402077.7	0.00774898	0.442866	0.304731	0.688087	486.526	243.629
KCTD17	7.59609e-05	ENST00000462640.1	0.0415334	0.236215	0.346042	1.46495	257.916	277.063
KCTD17	7.59609e-05	ENST00000610767.4	0.948764	0.320918	0.349227	1.08821	350.83	278.189
KHSRP	0.000747131	ENST00000398148.7	1	0.439793	0.437422	0.994609	15943.5	17838
KHSRP	0.000747131	ENST00000594496.5	0.106775	0.335599	0.369412	1.10075	12160.5	15077.3
KHSRP	0.000747131	ENST00000595112.5	0.0566495	0.224608	0.193167	0.860016	8145.28	7847.41
KIF18B	0.00105842	ENST00000585687.1	0.969242	0.149816	0.142407	0.950551	919.439	658.063
KIF18B	0.00105842	ENST00000587309.5	1	0.510662	0.509603	0.997926	3139.67	2360.49
KIF18B	0.00105842	ENST00000590129.1	0.0174266	0.0886023	0.12131	1.36915	546.571	559.895
KIF18B	0.00105842	ENST00000593135.6	0.48085	0.25092	0.226679	0.903394	1539.65	1047.49
KIF23	3.80464e-05	ENST00000352331.8	0.694806	0.387396	0.413149	1.06648	5953.69	5844.57
KIF23	3.80464e-05	ENST00000558585.5	0.106204	0.227803	0.271614	1.19232	3510.55	3831.29
KIF23	3.80464e-05	ENST00000647715.1	0.00313496	0.384801	0.315237	0.819219	5913.53	4440.18
KIF9	0.000121824	ENST00000265529.7	1	0.118475	0.126655	1.06904	77.878	59.2884
KIF9	0.000121824	ENST00000425452.1	0.0100308	0.210747	0.101421	0.481244	143.841	47.5416
KIF9	0.000121824	ENST00000425853.5	0.545782	0.178734	0.126685	0.708788	120.234	62.9648
KIF9	0.000121824	ENST00000432493.5	0.0326929	0.38009	0.522972	1.37592	259.766	252.032
KIF9	0.000121824	ENST00000487440.5	1	0.111954	0.122268	1.09213	73.1765	57.6793
KRT17	0.000282398	ENST00000311208.13	0.0124995	0.0119805	0.198881	16.6004	5.21905	33.0527
KRT17	0.000282398	ENST00000590038.1	0.897259	0.0721762	0.123103	1.7056	11.5805	20.9479
KRT17	0.000282398	ENST00000649249.1	0.123427	0.915843	0.678015	0.740318	130.054	123.857
KRT80	1.64051e-14	ENST00000313234.9	2.79923e-11	0.363762	0.178852	0.491672	765.066	286.019
KRT80	1.64051e-14	ENST00000394815.3	2.79923e-11	0.636238	0.821148	1.29063	1342.52	1324.43
L2HGDH	4.33725e-06	ENST00000261699.8	9.83017e-05	0.0130826	0.129837	9.92441	20.7613	77.284
L2HGDH	4.33725e-06	ENST00000267436.9	0.922615	0.399973	0.432363	1.08098	227.386	271.583
L2HGDH	4.33725e-06	ENST00000421284.7	0.70578	0.30505	0.232625	0.76258	172.996	146.245
L2HGDH	4.33725e-06	ENST00000555610.1	0.907016	0.137419	0.103954	0.756476	76.6981	61.9331
L2HGDH	4.33725e-06	ENST00000556393.1	0.821384	0.144476	0.101221	0.700606	79.3884	65.0279
LARGE2	0.000106205	ENST00000325468.9	0.0359724	0.301454	0.50507	1.67544	183.5	278.504
LARGE2	0.000106205	ENST00000401752.6	0.0159233	0.303869	0.128602	0.423215	176.676	77.0359
LARGE2	0.000106205	ENST00000414027.2	0.790723	0.221245	0.162574	0.734816	123.271	86.8702
LARGE2	0.000106205	ENST00000528236.5	0.967747	0.173432	0.203754	1.17483	95.5218	110.659
LARP6	3.73024e-08	ENST00000299213.10	0.0238331	0.124665	0.165453	1.32718	760.378	812.866
LARP6	3.73024e-08	ENST00000344870.4	3.71996e-06	0.704064	0.616003	0.874925	4310.84	3041.96
LARP6	3.73024e-08	ENST00000559316.2	0.0177774	0.171272	0.218545	1.27601	1046.61	1077.71
LARS1	8.22649e-06	ENST00000274562.13	0.99241	0.174196	0.180429	1.03578	1332.28	1321.83
LARS1	8.22649e-06	ENST00000394434.7	0.000275456	0.163366	0.113733	0.696185	1250.41	829.616
LARS1	8.22649e-06	ENST00000510191.5	1	0.318243	0.322499	1.01337	2438.15	2359.68
LARS1	8.22649e-06	ENST00000674310.1	0.169617	0.344195	0.383339	1.11373	2638.68	2802.84
LHPP	0.00122665	ENST00000368842.10	0.539322	0.652487	0.459041	0.703526	171.547	82.0695
LHPP	0.00122665	ENST00000392757.8	0.99241	0.318638	0.337052	1.05779	81.2509	59.7497
LHPP	0.00122665	ENST00000481452.1	0.0306292	0.0288751	0.203906	7.06166	22.1028	37.0639
LIN52	0.000902471	ENST00000554076.5	0.0186894	0.220486	0.31453	1.42653	518.349	621.002
LIN52	0.000902471	ENST00000555028.6	0.366852	0.571862	0.509417	0.890804	1352.81	1006.82
LIN52	0.000902471	ENST00000674221.1	0.759034	0.207651	0.176052	0.847827	491.611	351.757
LIPA	2.92559e-06	ENST00000336233.10	0.000825741	0.934313	0.842319	0.901539	1776.11	871.981
LIPA	2.92559e-06	ENST00000371837.5	0.000825741	0.065687	0.157681	2.40049	119.839	159.625
LRIF1	0.000816796	ENST00000369763.5	0.0504115	0.508353	0.408863	0.80429	714.904	600.541
LRIF1	0.000816796	ENST00000485275.2	0.0504115	0.491647	0.591137	1.20236	692.183	872.084
LYNX1	0.000667143	ENST00000614491.1	0.157158	0.234632	0.0657631	0.280282	74.2914	33.3333
LYNX1	0.000667143	ENST00000620006.4	0.0821938	0.0563295	0.223971	3.97609	25.4467	71.5885
LYNX1	0.000667143	ENST00000621401.4	0.969746	0.413687	0.457448	1.10578	148.67	155.261
LYNX1	0.000667143	ENST00000652477.1	0.980183	0.295351	0.252818	0.855993	103.037	83.1892
MACF1	6.59026e-21	ENST00000469490.1	0.000141518	0.284799	0.204336	0.717474	1407.84	612.897
MACF1	6.59026e-21	ENST00000530275.3	2.95361e-05	0.384461	0.29083	0.756461	1902.07	871.528
MACF1	6.59026e-21	ENST00000671089.1	3.86774e-18	0.330739	0.504834	1.52638	1636.02	1514.44
MACROH2A1	1.51029e-07	ENST00000304332.8	0.0282615	0.558241	0.510395	0.914291	7641.81	6431.27
MACROH2A1	1.51029e-07	ENST00000312469.8	1.35765e-05	0.278948	0.347961	1.2474	3812.76	4369.19
MACROH2A1	1.51029e-07	ENST00000510038.1	0.365765	0.162811	0.141644	0.86999	2224.31	1774.05
MAFA	0.00132438	ENST00000333480.3	0.0679954	0.755209	0.942257	1.24768	147.41	158.653
MAFA	0.00132438	ENST00000528185.1	0.0679954	0.244791	0.0577428	0.235886	47.4302	11.2349
MAP2K4	0.000864358	ENST00000353533.10	0.01838	0.637896	0.717789	1.12524	1377.14	1791.14
MAP2K4	0.000864358	ENST00000415385.7	0.628214	0.132768	0.107826	0.812134	284.384	268.47
MAP2K4	0.000864358	ENST00000582897.5	0.106204	0.229336	0.174386	0.760394	495.136	431.692
MAP3K11	3.4994e-05	ENST00000309100.8	0.605291	0.83558	0.699109	0.836675	2240.31	1658.21
MAP3K11	3.4994e-05	ENST00000524856.1	1	0.152316	0.150142	0.985727	363.258	317.543
MAP3K11	3.4994e-05	ENST00000529839.1	0.00139711	0.0121035	0.150749	12.4549	218.795	343.615
MAP3K15	0.000409102	ENST00000338883.8	0.273495	0.520321	0.747854	1.43729	56.9864	97.399
MAP3K15	0.000409102	ENST00000359173.7	0.0262768	0.152369	0.0105294	0.0691046	14.9752	3.9693
MAP3K15	0.000409102	ENST00000518578.5	0.830101	0.32731	0.241616	0.738188	34.8848	29.5011
MAP7D1	1.15272e-05	ENST00000316156.8	0.00054858	0.21206	0.284015	1.33931	1446.13	1615.11
MAP7D1	1.15272e-05	ENST00000373150.8	0.0445283	0.625427	0.567085	0.906716	4260.98	3229.31
MAP7D1	1.15272e-05	ENST00000373151.6	0.879402	0.162513	0.1489	0.916234	1104.65	842.387
MARCHF3	0.000257558	ENST00000308660.6	1	0.206089	0.208487	1.01163	304.377	265.291
MARCHF3	0.000257558	ENST00000504239.1	0.169301	0.128058	0.181367	1.41629	188.099	230.936
MARCHF3	0.000257558	ENST00000506088.1	0.0163357	0.532856	0.429018	0.80513	794.015	551.626
MARCHF3	0.000257558	ENST00000515241.1	0.268322	0.132996	0.181128	1.3619	201.391	230.811
MCTP1	0.000708606	ENST00000505465.1	0.00586557	0.254211	0.0271498	0.1068	20.6069	1.55661
MCTP1	0.000708606	ENST00000509850.2	0.940429	0.349482	0.450484	1.289	27.6068	26.1501
MCTP1	0.000708606	ENST00000514040.1	0.736523	0.256938	0.391873	1.52517	19.8667	21.9174
MCTP1	0.000708606	ENST00000515393.5	1	0.139369	0.130493	0.936311	9.55168	7.70716
MELK	0.000100103	ENST00000298048.7	0.0303259	0.494237	0.562997	1.13912	3129.38	3399.43
MELK	0.000100103	ENST00000541717.4	0.0163357	0.202771	0.14773	0.728559	1279.38	886.231
MELK	0.000100103	ENST00000543751.5	0.95521	0.302992	0.289273	0.95472	1924.06	1757.6
MESD	0.000923741	ENST00000261758.6	0.0547169	0.866214	0.918507	1.06037	1868.46	1961.41
MESD	0.000923741	ENST00000561312.5	0.0547169	0.133786	0.0814932	0.609133	284.803	170.4
MFF	0.000634231	ENST00000304593.14	0.0421853	0.223018	0.304418	1.36499	636.386	853.498
MFF	0.000634231	ENST00000354503.10	0.0421853	0.776982	0.695582	0.895236	2243.56	1944.39
MORF4L1	2.37647e-05	ENST00000426013.7	0.00157462	0.171167	0.133208	0.778234	7487.51	3181.43
MORF4L1	2.37647e-05	ENST00000558502.5	0.928748	0.467646	0.478252	1.02268	20503.8	11426.8
MORF4L1	2.37647e-05	ENST00000559619.5	0.291627	0.361187	0.388541	1.07573	15877	9273.49
MOSMO	0.00111847	ENST00000542527.7	0.0578076	0.334355	0.448495	1.34137	259.959	343.145
MOSMO	0.00111847	ENST00000562695.1	0.997339	0.204646	0.220174	1.07588	160.55	166.748
MOSMO	0.00111847	ENST00000567004.1	0.783992	0.127356	0.0970588	0.762105	97.0417	73.754
MOSMO	0.00111847	ENST00000568049.1	0.829578	0.194787	0.161568	0.82946	151.868	122.949
MOSMO	0.00111847	ENST00000569656.5	0.0884522	0.138856	0.072704	0.523594	108.65	55.3406
MRPL33	0.000400341	ENST00000296102.8	0.0303259	0.448381	0.400669	0.893589	6874.07	6317.44
MRPL33	0.000400341	ENST00000379666.7	0.0303259	0.551619	0.599331	1.0865	8461.73	9441.03
MRPS27	9.37948e-06	ENST00000457646.8	0.00223721	0.886027	0.792468	0.894406	2145.95	2266.28
MRPS27	9.37948e-06	ENST00000508863.6	0.00223721	0.113973	0.207532	1.82089	283.082	584.259
MSRB3	8.63482e-05	ENST00000308259.10	0.0106936	0.306741	0.456604	1.48856	376.39	568.089
MSRB3	8.63482e-05	ENST00000355192.8	0.0106936	0.693259	0.543396	0.783829	854.906	669.773
MTERF1	4.62947e-05	ENST00000351870.8	0.96614	0.334513	0.38504	1.15104	193.724	204.153
MTERF1	4.62947e-05	ENST00000406735.6	0.899096	0.374309	0.448811	1.19904	218.502	235.749
MTERF1	4.62947e-05	ENST00000425936.1	0.88449	0.0918962	0.137809	1.49962	49.0356	66.5153
MTERF1	4.62947e-05	ENST00000442961.1	0.000579836	0.199281	0.0283399	0.142211	121.928	45.5227
MTSS2	2.92706e-05	ENST00000338779.11	0.0032006	0.505432	0.425025	0.840916	2067.35	2087.03
MTSS2	2.92706e-05	ENST00000562883.6	0.0238331	0.227859	0.287546	1.26195	932.203	1413.85
MTSS2	2.92706e-05	ENST00000576338.1	0.825383	0.266709	0.287429	1.07769	1089.6	1411.36
MUC1	0.000403966	ENST00000466913.1	0.210361	0.345329	0.138588	0.401321	174.127	52.8658
MUC1	0.000403966	ENST00000611571.4	0.999382	0.279427	0.284118	1.01679	114.865	56.361
MUC1	0.000403966	ENST00000611577.4	0.986689	0.131334	0.104434	0.795178	46.5368	23.5187
MUC1	0.000403966	ENST00000620103.4	0.974488	0.226388	0.281769	1.24463	96.895	55.8779
MUC1	0.000403966	ENST00000620770.1	0.0170652	0.0175214	0.19109	10.9061	14.7278	40.862
MXRA7	6.44341e-05	ENST00000375036.6	0.00859213	0.279704	0.219679	0.785397	2966.7	1662.34
MXRA7	6.44341e-05	ENST00000449428.6	0.00859213	0.720296	0.780321	1.08333	7636.02	5894.19
MYO1B	1.79941e-14	ENST00000339514.8	0.00328206	0.166193	0.229051	1.37822	841.522	1147.84
MYO1B	1.79941e-14	ENST00000392316.5	0.00011162	0.209721	0.291339	1.38917	1060.9	1469.61
MYO1B	1.79941e-14	ENST00000392318.8	4.23606e-12	0.624086	0.47961	0.7685	3168.72	2400.04
MYO5A	1.12661e-07	ENST00000356338.10	2.09742e-05	0.139658	0.0775333	0.555165	339.709	226.889
MYO5A	1.12661e-07	ENST00000399228.5	0.959427	0.196121	0.184805	0.942301	474.507	540.596
MYO5A	1.12661e-07	ENST00000399229.6	1	0.175523	0.181383	1.03338	424.322	528.877
MYO5A	1.12661e-07	ENST00000399231.7	0.029125	0.188771	0.242804	1.28624	458.345	710.37
MYO5A	1.12661e-07	ENST00000553916.5	0.953041	0.299927	0.313475	1.04517	728.264	915.615
NAA38	0.000172507	ENST00000575071.5	0.973924	0.395156	0.382426	0.967785	2926	2627.61
NAA38	0.000172507	ENST00000575208.2	0.201528	0.186759	0.2296	1.2294	1377.68	1587.4
NAA38	0.000172507	ENST00000575771.5	0.84487	0.263128	0.284438	1.08099	1946.76	1953.63
NAA38	0.000172507	ENST00000576861.5	0.0117756	0.154958	0.103536	0.668153	1154.93	700.898
NAPG	1.29595e-07	ENST00000322897.11	0.000216023	0.500448	0.321466	0.642356	889.787	382.688
NAPG	1.29595e-07	ENST00000580224.5	0.83677	0.30362	0.34189	1.12604	559.934	404.553
NAPG	1.29595e-07	ENST00000582978.5	0.0027859	0.0822936	0.183879	2.23442	144.605	214.843
NAPG	1.29595e-07	ENST00000583367.1	0.614381	0.113637	0.152765	1.34432	199.737	178.863
NCOA2	0.000501576	ENST00000452400.7	0.0355956	0.897286	0.789856	0.880272	788.389	715.736
NCOA2	0.000501576	ENST00000521239.1	0.0355956	0.102714	0.210144	2.04592	85.2494	186.947
NCOR2	1.10826e-24	ENST00000356219.7	9.6302e-10	0.21348	0.127865	0.598953	1557.98	790.478
NCOR2	1.10826e-24	ENST00000404121.6	4.34092e-16	0.148053	0.263809	1.78186	1089.05	1638.63
NCOR2	1.10826e-24	ENST00000404621.5	0.161671	0.214805	0.179529	0.835777	1565.88	1114.23
NCOR2	1.10826e-24	ENST00000448614.1	0.959427	0.423663	0.428798	1.01212	3096.16	2672.65
NDUFB10	0.000389975	ENST00000268668.11	0.0301448	0.86739	0.830517	0.957491	9036.19	7732.39
NDUFB10	0.000389975	ENST00000543683.6	0.0301448	0.13261	0.169483	1.27805	1374.97	1575.71
NECAB2	2.59505e-05	ENST00000305202.8	1	0.278135	0.292347	1.0511	64.32	44.1584
NECAB2	2.59505e-05	ENST00000564166.1	0.00116555	0.223879	0.0107884	0.0481884	51.7262	7.47037
NECAB2	2.59505e-05	ENST00000565691.5	0.457926	0.497986	0.696865	1.39937	120.565	108.233
NECTIN2	2.66387e-22	ENST00000252483.10	5.35222e-19	0.426654	0.281993	0.660941	3293.49	1892.15
NECTIN2	2.66387e-22	ENST00000252485.8	8.83069e-08	0.28179	0.375942	1.33412	2169.57	2532.04
NECTIN2	2.66387e-22	ENST00000585601.1	0.0322282	0.291556	0.342065	1.17324	2245.2	2297.55
NEDD4	5.94464e-05	ENST00000435532.7	0.00374725	0.257095	0.405611	1.57767	1139.13	2306.13
NEDD4	5.94464e-05	ENST00000508075.1	0.177877	0.574405	0.477723	0.831684	2620.75	2758.6
NEDD4	5.94464e-05	ENST00000557845.1	0.442485	0.1685	0.116666	0.692377	750.987	681.299
NME6	0.00114809	ENST00000426689.6	0.0366122	0.34106	0.1195	0.350379	415.866	195.708
NME6	0.00114809	ENST00000451657.6	0.962314	0.417374	0.46276	1.10874	485.98	486.59
NME6	0.00114809	ENST00000643457.1	0.433839	0.241566	0.41774	1.7293	285.815	441.231
NSFL1C	9.22188e-05	ENST00000381653.9	0.502698	0.148063	0.166638	1.12545	1387.47	1525.68
NSFL1C	9.22188e-05	ENST00000476071.5	0.00379528	0.341706	0.289502	0.847227	3212.48	2659.21
NSFL1C	9.22188e-05	ENST00000555568.5	0.236848	0.510231	0.54386	1.06591	4795.33	4999.17
NTHL1	9.68105e-06	ENST00000219066.5	0.00224184	0.293883	0.489053	1.66411	446.273	692.345
NTHL1	9.68105e-06	ENST00000651570.2	0.00224184	0.706117	0.510947	0.7236	1071.02	721.267
NUCKS1	0.000328648	ENST00000367142.5	0.0282615	0.849334	0.931496	1.09674	19970.9	22143.6
NUCKS1	0.000328648	ENST00000464938.1	0.0282615	0.150666	0.068504	0.454675	3490.35	1677.5
PACRGL	0.000146928	ENST00000360916.9	0.133527	0.270857	0.46621	1.72124	166.056	203.413
PACRGL	0.000146928	ENST00000467997.6	0.00885514	0.444962	0.202485	0.455061	263.012	93.2616
PACRGL	0.000146928	ENST00000508952.5	0.958475	0.284181	0.331305	1.16582	164.749	144.007
PAPSS2	0.000341437	ENST00000361175.8	0.0284191	0.778684	0.84473	1.08482	2866.62	3893.69
PAPSS2	0.000341437	ENST00000456849.2	0.0284191	0.221316	0.15527	0.701579	816.088	707.058
PCBP2	1.15434e-05	ENST00000359462.9	0.635281	0.343445	0.361943	1.05386	11788.6	2316.41
PCBP2	1.15434e-05	ENST00000552296.6	0.282288	0.405427	0.433242	1.06861	13930	2762.95
PCBP2	1.15434e-05	ENST00000552819.5	0.000565412	0.251127	0.204815	0.81558	8615.05	1307.83
PCGF1	0.000568891	ENST00000233630.11	0.936768	0.667953	0.707919	1.05983	1134.63	1079.5
PCGF1	0.000568891	ENST00000463744.1	0.0336516	0.205561	0.0929043	0.451956	346.137	158.778
PCGF1	0.000568891	ENST00000475863.5	0.418099	0.126486	0.199176	1.57469	212.738	297.01
PDCD2	0.00022571	ENST00000392090.6	0.0260503	0.506031	0.589561	1.16507	1298.68	1500.1
PDCD2	0.00022571	ENST00000541970.6	0.993257	0.217283	0.207503	0.954989	556.38	525.946
PDCD2	0.00022571	ENST00000544866.5	0.0186894	0.276686	0.202936	0.733453	708.495	522.256
PDPK1	0.00017401	ENST00000342085.9	0.716713	0.711739	0.835203	1.17347	1021.33	1047.56
PDPK1	0.00017401	ENST00000462923.2	1	0.15798	0.151623	0.959764	207.382	179.735
PDPK1	0.00017401	ENST00000561962.1	0.00516452	0.130281	0.0131735	0.101116	176.636	74.1705
PHF19	1.58549e-06	ENST00000312189.10	0.000527652	0.771713	0.856677	1.1101	5080.08	4720.84
PHF19	1.58549e-06	ENST00000373896.8	0.000527652	0.228287	0.143323	0.627816	1499.3	785.736
PHF20	5.45237e-05	ENST00000374012.8	0.00759719	0.644473	0.722276	1.12072	2361.38	2390.74
PHF20	5.45237e-05	ENST00000617560.1	0.00759719	0.355527	0.277724	0.781161	1300.41	918.317
PHF20L1	8.14144e-07	ENST00000220847.8	0.468345	0.511068	0.453041	0.88646	729.347	610.734
PHF20L1	8.14144e-07	ENST00000395374.1	0.215719	0.143231	0.198691	1.38721	201.223	269.958
PHF20L1	8.14144e-07	ENST00000395379.5	0.00749516	0.102374	0.181571	1.77361	147.574	245.504
PHF20L1	8.14144e-07	ENST00000395390.6	0.0476038	0.243327	0.166696	0.685071	344.632	224.722
PICALM	0.00111316	ENST00000529760.5	0.109617	0.163505	0.205949	1.25959	1599.22	2234.82
PICALM	0.00111316	ENST00000530542.1	0.212981	0.201264	0.163521	0.812471	1962.36	1769.78
PICALM	0.00111316	ENST00000531930.5	0.598472	0.202055	0.176789	0.874955	2003.53	1947.29
PICALM	0.00111316	ENST00000532317.5	0.863681	0.433176	0.453741	1.04747	4225.9	4946.55
PILRA	0.00038924	ENST00000432297.6	0.0303259	0.225482	0.742213	3.29167	5.53862	26.6779
PILRA	0.00038924	ENST00000484934.1	0.0303259	0.774518	0.257787	0.332836	20.7773	7.13974
PINK1	8.94801e-05	ENST00000321556.5	0.0109374	0.790056	0.883284	1.118	1345.64	1800.6
PINK1	8.94801e-05	ENST00000400490.2	0.0109374	0.209944	0.116716	0.555938	358.72	235.165
PLAAT3	0.00019398	ENST00000323646.9	0.95731	0.423945	0.392565	0.925981	437.059	451.196
PLAAT3	0.00019398	ENST00000394613.3	0.17198	0.440853	0.226774	0.514399	483.989	261.362
PLAAT3	0.00019398	ENST00000639271.1	0.0158186	0.135202	0.38066	2.8155	191.612	461.668
PLCD1	7.1088e-05	ENST00000417185.6	0.156611	0.31612	0.0554685	0.175466	46.1845	16.7948
PLCD1	7.1088e-05	ENST00000463876.5	0.705225	0.667077	0.671634	1.00683	95.0269	73.5278
PLCD1	7.1088e-05	ENST00000495367.1	0.041785	0.0168026	0.272897	16.2414	5.38256	33.4869
PLEKHM2	6.47099e-09	ENST00000375793.2	0.00132296	0.337148	0.465745	1.38143	770.662	976.602
PLEKHM2	6.47099e-09	ENST00000375799.8	9.27167e-07	0.443996	0.276594	0.622964	1015.74	574.333
PLEKHM2	6.47099e-09	ENST00000642363.1	0.663953	0.218855	0.257661	1.17731	500.742	535.578
PLRG1	4.32578e-06	ENST00000302078.9	0.995507	0.339272	0.33141	0.976828	2236.89	2632.67
PLRG1	4.32578e-06	ENST00000499023.7	0.00122334	0.264928	0.202702	0.765121	1745.17	1612.97
PLRG1	4.32578e-06	ENST00000504341.1	0.108123	0.183466	0.222193	1.21109	1215.79	1767.89
PLRG1	4.32578e-06	ENST00000512773.1	0.31195	0.212334	0.243694	1.14769	1397.68	1958.92
PNKP	0.000178533	ENST00000322344.8	0.00610892	0.357768	0.458182	1.28067	888.577	970.108
PNKP	0.000178533	ENST00000594661.5	0.667108	0.293448	0.258104	0.879557	725.129	541.262
PNKP	0.000178533	ENST00000596624.1	0.14711	0.348784	0.283714	0.813436	866.036	594.164
POLR1G	9.27759e-05	ENST00000589804.1	0.0112965	0.567019	0.745896	1.31547	199.122	467.084
POLR1G	9.27759e-05	ENST00000592852.1	0.0112965	0.432981	0.254104	0.586871	150.208	157.473
POP1	0.000487526	ENST00000349693.3	0.793445	0.441252	0.527765	1.19606	483.606	475.446
POP1	0.000487526	ENST00000401707.7	1	0.404196	0.434332	1.07456	440.984	389.861
POP1	0.000487526	ENST00000522319.5	0.0124125	0.154552	0.0379028	0.245244	165.554	57.4931
POU6F1	0.000447258	ENST00000546685.5	0.0256656	0.187267	0.488598	2.60909	69.3138	129.794
POU6F1	0.000447258	ENST00000547854.1	1	0.272307	0.278596	1.0231	55.7491	66.6438
POU6F1	0.000447258	ENST00000636119.1	0.27962	0.300748	0.120378	0.400263	62.7509	27.6975
POU6F1	0.000447258	ENST00000636728.1	0.537871	0.239678	0.112427	0.469078	47.0853	22.2495
PPARA	0.000764907	ENST00000407236.5	0.00891612	0.325386	0.198453	0.6099	197.629	112.574
PPARA	0.000764907	ENST00000420804.5	1	0.146207	0.158306	1.08276	88.5481	89.6013
PPARA	0.000764907	ENST00000493286.1	0.170999	0.339778	0.437713	1.28823	206.207	250.413
PPARA	0.000764907	ENST00000624793.1	0.988174	0.18863	0.205528	1.08958	112.922	117.681
PPFIA1	1.79214e-07	ENST00000389547.7	0.868823	0.138766	0.118538	0.854229	243.167	213.731
PPFIA1	1.79214e-07	ENST00000528750.1	3.64333e-06	0.227848	0.373086	1.63744	396.863	673.891
PPFIA1	1.79214e-07	ENST00000530746.1	0.218031	0.284699	0.223039	0.783421	500.561	400.242
PPFIA1	1.79214e-07	ENST00000532024.1	0.264814	0.348687	0.285336	0.818318	611.249	514.186
PPHLN1	0.000227832	ENST00000395580.7	0.0793932	0.162016	0.213706	1.31904	578.577	654.611
PPHLN1	0.000227832	ENST00000449194.6	0.0242847	0.421358	0.346989	0.823503	1508.7	1050.62
PPHLN1	0.000227832	ENST00000552761.5	0.878382	0.416627	0.439305	1.05443	1489.76	1329.52
PPP6R2	7.51937e-11	ENST00000216061.9	1	0.204237	0.205993	1.0086	264.746	237.251
PPP6R2	7.51937e-11	ENST00000395744.7	5.43788e-09	0.0552986	0.190926	3.45263	72.7883	222.981
PPP6R2	7.51937e-11	ENST00000470046.1	0.969236	0.130942	0.117248	0.895418	167.998	132.666
PPP6R2	7.51937e-11	ENST00000612753.5	0.0085172	0.609522	0.485833	0.797072	797.799	564.895
PRDM15	1.70856e-05	ENST00000447016.6	0.320449	0.497931	0.231132	0.464186	73.7881	41.6094
PRDM15	1.70856e-05	ENST00000465955.1	0.680998	0.185729	0.0704312	0.379215	27.3472	16.1126
PRDM15	1.70856e-05	ENST00000486812.5	0.98984	0.231195	0.188076	0.813495	29.1717	31.157
PRDM15	1.70856e-05	ENST00000491486.5	0.0442544	0.0476871	0.274789	5.76233	18.3017	50.3183
PRDM15	1.70856e-05	ENST00000496124.1	0.0461355	0.0374582	0.235571	6.28891	10.0441	45.7649
PROSER3	0.000283979	ENST00000396908.8	0.790723	0.135392	0.154273	1.13945	301.031	226.863
PROSER3	0.000283979	ENST00000542591.1	0.00418024	0.231119	0.164854	0.713286	515.266	243.487
PROSER3	0.000283979	ENST00000544158.2	0.690642	0.22845	0.25493	1.11591	509.801	377.483
PROSER3	0.000283979	ENST00000600988.1	0.475581	0.130989	0.158948	1.21345	290.817	233.56
PROSER3	0.000283979	ENST00000620918.4	1	0.27405	0.266995	0.974259	610.889	393.508
PTCH1	0.000719382	ENST00000375271.4	0.988174	0.259636	0.20827	0.802163	70.7117	63.5396
PTCH1	0.000719382	ENST00000429896.6	0.986543	0.390004	0.338769	0.868627	109.881	106.144
PTCH1	0.000719382	ENST00000551630.1	0.830231	0.319013	0.204407	0.640748	88.2688	76.5845
PTCH1	0.000719382	ENST00000551845.5	0.00862834	0.0313463	0.248554	7.92928	34.9188	77.8349
PUF60	7.71123e-05	ENST00000349157.10	0.00359819	0.449881	0.292317	0.649766	607.119	348.381
PUF60	7.71123e-05	ENST00000456095.6	0.947609	0.16305	0.187548	1.15025	221.842	215.348
PUF60	7.71123e-05	ENST00000527197.5	0.0376236	0.387069	0.520134	1.34378	524.183	604.356
PUS7L	0.000794589	ENST00000416848.6	1	0.309304	0.301972	0.976293	267.814	312.483
PUS7L	0.000794589	ENST00000431332.7	0.211711	0.104153	0.178158	1.71053	89.2188	178.736
PUS7L	0.000794589	ENST00000547156.1	0.765852	0.121366	0.0870932	0.717605	103.867	92.0497
PUS7L	0.000794589	ENST00000551923.5	0.107327	0.325544	0.219199	0.67333	281.448	219.266
PUS7L	0.000794589	ENST00000553166.1	0.306674	0.139632	0.213579	1.52959	120.719	214.428
RAB31	2.22212e-18	ENST00000578737.5	5.91202e-15	0.0828082	0.258606	3.12296	240.668	553.18
RAB31	2.22212e-18	ENST00000578921.6	5.91202e-15	0.917192	0.741394	0.80833	2671.33	1585.68
RABGEF1	0.00134437	ENST00000284957.9	0.0884522	0.312396	0.24899	0.797034	637.699	387.867
RABGEF1	0.00134437	ENST00000450873.6	1	0.250811	0.256828	1.02399	512.277	399.932
RABGEF1	0.00134437	ENST00000461017.1	0.0582887	0.16368	0.223281	1.36414	334.274	348.546
RABGEF1	0.00134437	ENST00000484547.7	1	0.273114	0.270901	0.991897	559.447	421.702
RAC1	6.87171e-05	ENST00000348035.9	0.568836	0.590841	0.611899	1.03564	25089.8	24543.2
RAC1	6.87171e-05	ENST00000356142.4	0.163628	0.104982	0.126158	1.2017	4449.62	5029.89
RAC1	6.87171e-05	ENST00000497741.5	0.0102898	0.304177	0.261943	0.861155	12937.3	10487
RBBP6	2.93022e-06	ENST00000319715.10	1	0.55652	0.564078	1.01358	1485.15	1625.19
RBBP6	2.93022e-06	ENST00000348022.6	0.0574246	0.251379	0.317095	1.26142	674.101	911.217
RBBP6	2.93022e-06	ENST00000562683.2	0.00125024	0.192101	0.118827	0.618566	514.979	340.482
RBL1	3.78884e-07	ENST00000344359.7	0.10793	0.342066	0.394406	1.15301	1463.36	1261.88
RBL1	3.78884e-07	ENST00000373664.8	4.35276e-05	0.489168	0.391806	0.800965	2093.26	1254.96
RBL1	3.78884e-07	ENST00000525052.1	0.0813195	0.168766	0.213788	1.26677	725.475	683.547
RCSD1	0.000918693	ENST00000461790.1	0.064614	0.141747	0.668382	4.7153	18.6342	43.5887
RCSD1	0.000918693	ENST00000472038.1	0.885375	0.453891	0.29653	0.653308	17.6389	12.5792
RCSD1	0.000918693	ENST00000475127.5	0.196454	0.404362	0.0350877	0.0867731	30.4719	5.86664
REEP4	1.65822e-05	ENST00000306306.8	0.00322279	0.833674	0.922863	1.10698	1440.82	1560.5
REEP4	1.65822e-05	ENST00000334530.9	0.00322279	0.166326	0.0771374	0.463773	282.973	133.391
RMDN2	0.000398158	ENST00000354545.8	0.949459	0.605272	0.586742	0.969386	115.833	88.8104
RMDN2	0.000398158	ENST00000414644.5	0.0743189	0.199737	0.030979	0.155099	40.8196	7.17027
RMDN2	0.000398158	ENST00000425641.1	0.0931067	0.0291242	0.183906	6.31454	9.23353	28.7761
RMDN2	0.000398158	ENST00000440353.5	0.986438	0.165868	0.198373	1.19597	26.3132	26.4039
RNF114	0.000535351	ENST00000244061.6	0.0368639	0.890858	0.836562	0.939052	4809.71	4435.53
RNF114	0.000535351	ENST00000623528.3	0.0368639	0.109142	0.163438	1.49748	584.706	872.127
RNF166	0.000945694	ENST00000312838.9	0.0557912	0.752428	0.856781	1.13869	523.423	636.201
RNF166	0.000945694	ENST00000564894.1	0.0557912	0.247572	0.143219	0.578494	169.834	102.978
RPL23A	1.40209e-06	ENST00000355731.8	0.000290851	0.212512	0.158356	0.745165	20257.4	13554.8
RPL23A	1.40209e-06	ENST00000394935.7	0.00238086	0.617227	0.677091	1.09699	58919.2	58238.7
RPL23A	1.40209e-06	ENST00000422514.7	0.99241	0.170262	0.164553	0.96647	16156.8	14129.5
RPL36A-HNRNPH2	0.000228982	ENST00000409170.3	0.0214369	0.542893	0.651619	1.20027	1463.3	1601.04
RPL36A-HNRNPH2	0.000228982	ENST00000409338.5	0.0214369	0.457107	0.348381	0.762144	1225.51	855.062
RPS6KA3	0.00100137	ENST00000379565.9	0.0568932	0.580302	0.507585	0.874692	1638.29	1211.97
RPS6KA3	0.00100137	ENST00000646610.1	0.0568932	0.419698	0.492415	1.17326	1184.46	1174.8
S100A4	4.56927e-06	ENST00000368715.5	0.121129	0.220128	0.610573	2.77371	59.5411	89.976
S100A4	4.56927e-06	ENST00000368716.9	0.00268385	0.392894	0.0162525	0.0413662	56.2545	5.52349
S100A4	4.56927e-06	ENST00000481009.1	0.815673	0.386978	0.373175	0.964332	53.0206	47.4721
SAT1	0.000659943	ENST00000379253.7	0.593787	0.219172	0.193303	0.881969	1145.18	1020.09
SAT1	0.000659943	ENST00000379270.4	0.0181569	0.564862	0.632744	1.12017	2963.81	3359.52
SAT1	0.000659943	ENST00000474223.1	0.132746	0.215966	0.173953	0.805467	1130.14	915.831
SCLY	0.00143089	ENST00000254663.12	0.0249809	0.543372	0.389908	0.717571	741.893	420.357
SCLY	0.00143089	ENST00000409736.6	0.155373	0.293605	0.411002	1.39984	395.972	445.293
SCLY	0.00143089	ENST00000480859.5	0.874501	0.163022	0.199091	1.22125	228.029	226.234
SDR39U1	0.000164407	ENST00000399395.7	0.0172183	0.924234	0.692046	0.748778	476.811	371.563
SDR39U1	0.000164407	ENST00000544691.6	0.0172183	0.0757662	0.307954	4.06453	65.2712	156.459
SEC14L1	0.000392999	ENST00000436233.9	0.0336516	0.680275	0.6047	0.888905	4097.47	2772.08
SEC14L1	0.000392999	ENST00000443798.8	0.976939	0.156968	0.167754	1.06871	952.223	762.997
SEC14L1	0.000392999	ENST00000585618.5	0.0210548	0.162757	0.227546	1.39808	982.601	1036.78
SEC31A	1.5395e-14	ENST00000348405.8	3.75289e-11	0.378659	0.198778	0.524952	1274.59	591.993
SEC31A	1.5395e-14	ENST00000506495.5	0.376621	0.387027	0.441993	1.14202	1298.09	1310.33
SEC31A	1.5395e-14	ENST00000513858.5	9.062e-05	0.234315	0.359229	1.53311	785.992	1063.74
SERF1B	0.000106257	ENST00000380751.9	0.781612	0.716137	0.822623	1.1487	724.993	634.618
SERF1B	0.000106257	ENST00000514285.1	0.00367532	0.153191	0.013721	0.089568	131.45	60.0268
SERF1B	0.000106257	ENST00000515588.1	0.993672	0.130672	0.163656	1.25242	108.227	109.679
SFSWAP	0.000524325	ENST00000535236.5	0.805332	0.182149	0.228116	1.25236	135.277	151.629
SFSWAP	0.000524325	ENST00000538548.5	0.0137279	0.574959	0.411315	0.715381	434.706	277.606
SFSWAP	0.000524325	ENST00000542813.2	0.110017	0.242892	0.360569	1.48448	182.753	244.159
SH3YL1	0.00141942	ENST00000403657.5	0.775986	0.474399	0.316671	0.66752	63.5383	65.9891
SH3YL1	0.00141942	ENST00000403712.6	0.0262768	0.0823512	0.357589	4.34224	24.3449	75.9942
SH3YL1	0.00141942	ENST00000602998.1	0.940667	0.443249	0.32574	0.734892	60.4784	75.1902
SHQ1	0.000970932	ENST00000325599.13	0.0564281	0.72148	0.579292	0.802922	1151.52	791.277
SHQ1	0.000970932	ENST00000468347.1	0.0564281	0.27852	0.420708	1.51051	452.189	587.221
SIRT2	0.000147813	ENST00000249396.12	0.0359724	0.443705	0.582538	1.3129	264.983	360.587
SIRT2	0.000147813	ENST00000392081.6	0.00586557	0.404811	0.252237	0.623099	240.777	156.598
SIRT2	0.000147813	ENST00000481381.1	1	0.151484	0.165224	1.09071	89.1921	100.302
SKP2	3.3001e-06	ENST00000274254.9	0.000533714	0.136528	0.223035	1.63362	1080.97	1072.07
SKP2	3.3001e-06	ENST00000274255.11	0.00359819	0.713308	0.619936	0.869101	5707.35	3008.14
SKP2	3.3001e-06	ENST00000509692.5	1	0.150164	0.157029	1.04571	1196.34	757.952
SLC25A39	9.03015e-08	ENST00000225308.12	4.35276e-05	0.756325	0.868118	1.14781	3797.61	4558.74
SLC25A39	9.03015e-08	ENST00000377095.10	4.35276e-05	0.243675	0.131882	0.541222	1222.24	678.481
SLC30A9	1.78007e-07	ENST00000264451.12	1	0.262179	0.255909	0.976085	782.552	1069.99
SLC30A9	1.78007e-07	ENST00000505523.1	2.92538e-05	0.116051	0.211994	1.82674	342.838	874.651
SLC30A9	1.78007e-07	ENST00000513699.5	0.014523	0.62177	0.532097	0.855777	1867.85	2200.18
SLC38A1	0.000651334	ENST00000398637.10	0.0423395	0.727708	0.670476	0.921353	4591.87	4004.13
SLC38A1	0.000651334	ENST00000546893.5	0.0423395	0.272292	0.329524	1.21019	1714.32	1967.11
SLC4A5	0.000985586	ENST00000436454.1	1	0.0757586	0.0962501	1.27048	15.6929	11.8386
SLC4A5	0.000985586	ENST00000444570.5	0.00896786	0.290802	0.0402058	0.138258	45.9318	8.45149
SLC4A5	0.000985586	ENST00000479776.1	0.931914	0.196481	0.142083	0.72314	28.9705	13.0951
SLC4A5	0.000985586	ENST00000480696.1	0.359654	0.2914	0.496397	1.70349	47.8435	47.3048
SLC4A5	0.000985586	ENST00000483195.5	0.878382	0.145559	0.225064	1.5462	21.2334	20.623
SLC66A1	0.000313978	ENST00000375153.8	0.940989	0.226696	0.247104	1.09002	294.872	293.682
SLC66A1	0.000313978	ENST00000375155.7	0.311252	0.552459	0.61686	1.11657	719.062	738.934
SLC66A1	0.000313978	ENST00000432465.1	0.00814757	0.220845	0.136036	0.615982	286.085	160.78
SMG1P4	2.16186e-05	ENST00000380598.4	0.00384408	0.38682	0.0415658	0.107455	352.414	122.821
SMG1P4	2.16186e-05	ENST00000381448.8	0.00384408	0.61318	0.958434	1.56306	593.254	515.727
SMIM30	0.0014208	ENST00000397764.8	0.0718785	0.683137	0.80044	1.17171	908.777	903.291
SMIM30	0.0014208	ENST00000441359.1	0.0718785	0.316863	0.19956	0.629797	417.722	220.881
SMTN	0.000332243	ENST00000455608.5	0.0282615	0.740542	0.505619	0.682769	319.972	234.089
SMTN	0.000332243	ENST00000497697.5	0.0282615	0.259458	0.494381	1.90544	120.103	234.939
SNCA	0.000380928	ENST00000506244.5	0.0301822	0.264486	0.0351587	0.132932	90.0984	46.6908
SNCA	0.000380928	ENST00000508895.5	0.0301822	0.735514	0.964841	1.31179	280.298	302.936
SNRPB	7.39219e-09	ENST00000381342.7	4.28198e-06	0.75588	0.689591	0.912303	30990	28489.6
SNRPB	7.39219e-09	ENST00000438552.6	4.28198e-06	0.24412	0.310409	1.27154	9992.47	12827.4
SPEG	0.000876178	ENST00000396689.2	0.0270177	0.35383	0.238123	0.672988	416.8	205.256
SPEG	0.000876178	ENST00000431523.5	0.723472	0.165941	0.205873	1.24064	192.08	176.943
SPEG	0.000876178	ENST00000452101.1	0.102703	0.130423	0.209738	1.60814	159.318	189.067
SPEG	0.000876178	ENST00000485813.5	1	0.193216	0.180027	0.931741	223.885	153.754
SPEG	0.000876178	ENST00000498378.5	1	0.156591	0.166239	1.06161	180.604	142.596
SPTAN1	2.45675e-05	ENST00000358161.9	0.00418024	0.476051	0.41222	0.865916	3865.77	3905.21
SPTAN1	2.45675e-05	ENST00000372731.8	0.00418024	0.523949	0.58778	1.12183	4254.82	5566.32
SRI	4.54451e-05	ENST00000265729.7	0.980531	0.172678	0.196374	1.13723	709.895	757.171
SRI	4.54451e-05	ENST00000394641.7	0.654437	0.550452	0.625054	1.13553	2315.93	2431.82
SRI	4.54451e-05	ENST00000472930.6	1	0.147808	0.143318	0.96962	605.278	539.262
SRI	4.54451e-05	ENST00000490437.5	0.000629696	0.129062	0.0352538	0.273154	531.238	220.146
SSU72	1.1853e-05	ENST00000291386.4	0.00258856	0.866573	0.91612	1.05718	3226.29	4582.06
SSU72	1.1853e-05	ENST00000359060.5	0.00258856	0.133427	0.0838802	0.628659	492.608	413.229
STAT5A	0.00101744	ENST00000345506.8	0.980531	0.345933	0.42526	1.22932	118.55	81.5389
STAT5A	0.00101744	ENST00000468096.5	0.647596	0.0255465	0.0968429	3.79085	16.5384	25.0429
STAT5A	0.00101744	ENST00000479417.1	0.0192526	0.201215	0.0125291	0.0622671	61.05	14.7525
STAT5A	0.00101744	ENST00000588868.5	0.981882	0.427306	0.465368	1.08907	143.856	87.6958
SUPT3H	4.85192e-05	ENST00000371460.5	1	0.238759	0.233957	0.979886	107.156	127.468
SUPT3H	4.85192e-05	ENST00000475057.5	0.0574246	0.645474	0.43625	0.67586	301.508	245.943
SUPT3H	4.85192e-05	ENST00000637763.2	0.0032006	0.115767	0.329793	2.84877	64.2205	194.928
SYNJ2	7.52312e-07	ENST00000355585.9	0.000275456	0.624409	0.500996	0.802352	1293.28	967.354
SYNJ2	7.52312e-07	ENST00000367113.5	0.000275456	0.375591	0.499004	1.32858	776.627	963.478
SZRD1	0.000109938	ENST00000401088.9	0.00585909	0.308071	0.250998	0.814741	2150.23	1056.79
SZRD1	0.000109938	ENST00000401089.3	0.865552	0.334137	0.350759	1.04974	2334.11	1473.53
SZRD1	0.000109938	ENST00000471507.5	0.0675418	0.222536	0.265351	1.1924	1558.1	1116.83
SZRD1	0.000109938	ENST00000492354.1	1	0.135256	0.132892	0.982518	940.948	558.769
TERF1	0.000764106	ENST00000276602.10	0.0477307	0.537673	0.448571	0.834282	1070.48	851.6
TERF1	0.000764106	ENST00000276603.10	0.0477307	0.462327	0.551429	1.19273	921.356	1049.09
TERT	0.000482327	ENST00000656021.1	0.0347204	0.937798	0.418567	0.44633	14.9359	11.3595
TERT	0.000482327	ENST00000667927.1	0.0347204	0.0622018	0.581433	9.34753	3.29869	19.9705
TFAM	0.00108844	ENST00000373895.7	1	0.440045	0.432524	0.982909	3477.46	3794.73
TFAM	0.00108844	ENST00000373899.3	0.235189	0.0943407	0.121704	1.29005	743.42	1059.54
TFAM	0.00108844	ENST00000395377.2	0.477442	0.171938	0.198922	1.15694	1363.72	1755.51
TFAM	0.00108844	ENST00000487519.6	0.0979547	0.293677	0.24685	0.84055	2316.57	2178.85
TFPI	8.91255e-11	ENST00000233156.9	5.70552e-08	0.424197	0.307895	0.725831	2663.67	1145.24
TFPI	8.91255e-11	ENST00000339091.8	5.56048e-05	0.321287	0.415497	1.29322	2020.64	1533.54
TFPI	8.91255e-11	ENST00000453013.5	0.784835	0.254516	0.276608	1.0868	1597.81	1029.13
TGM2	1.06119e-10	ENST00000361475.7	9.59557e-08	0.700213	0.621412	0.887461	15858.7	10585.9
TGM2	1.06119e-10	ENST00000468262.5	9.59557e-08	0.299787	0.378588	1.26286	6780.28	6433.55
THAP2	6.5707e-05	ENST00000308086.3	1	0.162071	0.176738	1.09049	60.0548	69.3319
THAP2	6.5707e-05	ENST00000547843.1	0.01838	0.711956	0.547173	0.768549	272.495	219.929
THAP2	6.5707e-05	ENST00000551488.5	0.00476083	0.125972	0.276089	2.19166	46.837	109.569
THBS1	3.54223e-05	ENST00000260356.6	0.00547218	0.833071	0.888411	1.06643	11300.2	14520.1
THBS1	3.54223e-05	ENST00000490247.1	0.00547218	0.166929	0.111589	0.668483	2252.36	1812.73
TLCD3A	5.34002e-05	ENST00000308278.13	0.101343	0.633249	0.553155	0.873518	1928.65	1269.95
TLCD3A	5.34002e-05	ENST00000570699.1	1	0.221313	0.210814	0.95256	669.248	484.881
TLCD3A	5.34002e-05	ENST00000577008.1	0.00270273	0.145437	0.236031	1.6229	452.166	540.382
TMEFF2	0.00120104	ENST00000272771.10	0.896662	0.504914	0.5334	1.05642	59.2765	87.8413
TMEFF2	0.00120104	ENST00000392314.5	0.575321	0.474541	0.21655	0.456336	54.575	28.7843
TMEFF2	0.00120104	ENST00000487771.1	0.0480124	0.0205453	0.25005	12.1706	26.2706	44.463
TMEM145	0.000802198	ENST00000595775.5	0.175822	0.184622	0.0456761	0.247403	66.0316	22.6669
TMEM145	0.000802198	ENST00000598766.1	1	0.176226	0.182098	1.03332	60.023	59.9114
TMEM145	0.000802198	ENST00000601020.1	0.0288074	0.101686	0.349681	3.43883	74.298	137.584
TMEM145	0.000802198	ENST00000673187.1	0.972284	0.265267	0.208307	0.785274	95.9058	70.4875
TMEM145	0.000802198	ENST00000673205.1	0.967747	0.2722	0.214238	0.787062	95.6457	71.618
TMEM237	6.95997e-06	ENST00000286196.9	0.000926947	0.28598	0.433564	1.51607	889.746	1247.22
TMEM237	6.95997e-06	ENST00000409444.6	0.989738	0.167234	0.152353	0.911014	496.677	424.861
TMEM237	6.95997e-06	ENST00000432684.6	1	0.202612	0.195139	0.963115	607.99	547.458
TMEM237	6.95997e-06	ENST00000621467.4	0.00534873	0.344174	0.218945	0.636145	1049.95	624.867
TMEM254	1.09146e-05	ENST00000372281.8	0.878382	0.49378	0.545478	1.1047	422.255	319.93
TMEM254	1.09146e-05	ENST00000463209.1	0.323954	0.265549	0.368367	1.38719	224.28	221.48
TMEM254	1.09146e-05	ENST00000467529.5	0.000825694	0.240671	0.0861551	0.357979	207.07	55.0506
TNFRSF1A	0.000149218	ENST00000162749.7	0.199146	0.716924	0.67299	0.938719	5433.34	5317.07
TNFRSF1A	0.000149218	ENST00000437813.7	0.986736	0.168457	0.16022	0.951104	1278.3	1264.83
TNFRSF1A	0.000149218	ENST00000543359.5	0.00445447	0.114619	0.16679	1.45517	866.53	1316.21
TNNT1	0.000638054	ENST00000585321.6	0.58689	0.267174	0.226816	0.848944	2208.36	1573.78
TNNT1	0.000638054	ENST00000587465.6	0.00691625	0.141512	0.225541	1.5938	1157.44	1567.68
TNNT1	0.000638054	ENST00000589745.5	0.839659	0.476756	0.445199	0.93381	3966.66	3122.16
TNNT1	0.000638054	ENST00000593194.5	0.969236	0.114558	0.102443	0.894248	963.089	731.32
TNS2	5.16975e-05	ENST00000314250.11	0.00746123	0.64828	0.449487	0.693353	410.942	201.883
TNS2	5.16975e-05	ENST00000379902.7	0.00746123	0.35172	0.550513	1.5652	222.352	249.409
TNXB	0.000625689	ENST00000375244.7	0.988174	0.165386	0.207591	1.25519	22.206	15.1259
TNXB	0.000625689	ENST00000442721.1	0.893978	0.402253	0.239273	0.594833	25.9065	18.1877
TNXB	0.000625689	ENST00000490077.5	0.00487245	0.0195234	0.29714	15.2197	4.85238	24.7373
TNXB	0.000625689	ENST00000647633.1	0.95731	0.412837	0.255995	0.620089	27.0442	21.3148
TPST1	3.00497e-08	ENST00000304842.6	0.479373	0.493204	0.453264	0.91902	1615.86	1356.7
TPST1	3.00497e-08	ENST00000451388.1	2.82444e-06	0.0699965	0.141448	2.02079	230.123	425.374
TPST1	3.00497e-08	ENST00000480281.5	0.667108	0.4368	0.405288	0.927857	1430.51	1213.1
TRIM25	0.00102763	ENST00000316881.9	0.0576948	0.592612	0.655799	1.10662	2619.48	2568.66
TRIM25	0.00102763	ENST00000572550.1	0.0576948	0.407388	0.344201	0.844897	1799.94	1355.76
TRIM26	0.000860752	ENST00000416596.5	0.64683	0.244215	0.312613	1.28007	136.082	151.517
TRIM26	0.000860752	ENST00000453195.5	0.550307	0.43037	0.515854	1.19863	243.027	253.47
TRIM26	0.000860752	ENST00000454678.7	0.0177148	0.325415	0.171533	0.52712	192.658	84.6826
TRIOBP	0.000110359	ENST00000403663.6	0.0127923	0.793574	0.698489	0.880182	1447.16	920.46
TRIOBP	0.000110359	ENST00000407319.7	0.0127923	0.206426	0.301511	1.46062	373.337	395.409
TRMT10A	0.000818479	ENST00000394876.7	1	0.287866	0.336246	1.16806	165.996	190.933
TRMT10A	0.000818479	ENST00000394877.7	0.689508	0.185877	0.120179	0.646551	103.575	61.6701
TRMT10A	0.000818479	ENST00000455368.6	0.0359724	0.233687	0.0643739	0.275471	131.992	78.6528
TRMT10A	0.000818479	ENST00000514547.1	0.364699	0.29257	0.479201	1.6379	172.351	283.296
UBE2A	0.000238311	ENST00000371558.7	0.0220835	0.867107	0.789154	0.9101	3508.59	2134.02
UBE2A	0.000238311	ENST00000628549.1	0.0220835	0.132893	0.210846	1.58658	540.164	570.808
UBE2D4	0.00115693	ENST00000222402.8	0.530431	0.421457	0.294786	0.699446	497.804	338.156
UBE2D4	0.00115693	ENST00000440652.5	0.99241	0.402042	0.376851	0.93734	473.768	440.964
UBE2D4	0.00115693	ENST00000450743.5	1	0.127932	0.120041	0.93832	142.009	141.668
UBE2D4	0.00115693	ENST00000454428.5	0.0124995	0.0485688	0.208322	4.28922	108.07	274.076
UBE2E3	0.000896507	ENST00000392415.6	0.0192526	0.264072	0.192452	0.728788	1882.66	1277.9
UBE2E3	0.000896507	ENST00000410062.9	0.433839	0.456289	0.504654	1.106	3257.47	3269.64
UBE2E3	0.000896507	ENST00000602959.5	0.878382	0.279639	0.302894	1.08316	2009.21	1954.06
UBTF	0.00139641	ENST00000436088.6	0.0370041	0.270601	0.211871	0.782964	674.401	543.065
UBTF	0.00139641	ENST00000529383.5	0.975004	0.407251	0.420449	1.03241	1018.59	1080.48
UBTF	0.00139641	ENST00000533177.5	0.283993	0.322148	0.36768	1.14134	804.031	944.842
UMPS	0.000491296	ENST00000232607.7	0.152091	0.123055	0.0846574	0.687962	371.4	256.122
UMPS	0.000491296	ENST00000462091.5	0.253674	0.202633	0.159449	0.786884	624.514	488.512
UMPS	0.000491296	ENST00000467167.5	0.793767	0.315581	0.342907	1.08659	967.987	1054.49
UMPS	0.000491296	ENST00000479719.5	0.928748	0.243912	0.259923	1.06564	742.744	798.8
UMPS	0.000491296	ENST00000495751.1	0.221658	0.114819	0.153064	1.33308	351.173	468.137
UNC13D	2.25994e-05	ENST00000586930.1	0.00054858	0.606798	0.0717028	0.118166	69.7935	6.31398
UNC13D	2.25994e-05	ENST00000590856.1	0.706573	0.237751	0.479205	2.01558	21.8587	14.4133
UNC13D	2.25994e-05	ENST00000591563.5	0.270163	0.155451	0.449092	2.88897	12.3278	8.95034
USP10	0.000235352	ENST00000540269.6	1	0.530185	0.522476	0.985459	1732.04	1543.99
USP10	0.000235352	ENST00000562743.5	0.0332674	0.134233	0.191161	1.4241	434.437	565.109
USP10	0.000235352	ENST00000563048.5	1	0.192917	0.188746	0.978384	630.292	546.53
USP10	0.000235352	ENST00000563433.1	0.0731193	0.142666	0.0976164	0.684232	462.288	285.069
VKORC1	0.000988878	ENST00000354895.4	0.0565547	0.17434	0.225014	1.29066	744.309	853.939
VKORC1	0.000988878	ENST00000394975.3	0.0565547	0.82566	0.774986	0.938626	3542.79	2947.65
VPS13A	2.84169e-06	ENST00000376636.7	0.78186	0.258767	0.231535	0.89476	372.887	384.734
VPS13A	2.84169e-06	ENST00000471439.1	4.69389e-05	0.206027	0.313756	1.52289	297.668	525.343
VPS13A	2.84169e-06	ENST00000643348.1	0.694313	0.169406	0.143387	0.846412	243.225	238.599
VPS13A	2.84169e-06	ENST00000645632.1	0.261875	0.365799	0.311322	0.851072	528.008	518.064
VPS35	3.00441e-06	ENST00000568642.5	0.000351026	0.189372	0.0986937	0.521164	677.2	307.953
VPS35	3.00441e-06	ENST00000568784.6	0.0107702	0.660257	0.758533	1.14884	2370.61	2231.37
VPS35	3.00441e-06	ENST00000647959.1	1	0.150371	0.142774	0.949477	532.43	413.918
WDR20	6.3884e-05	ENST00000335263.9	0.00407785	0.351533	0.0935087	0.266003	221.559	65.2525
WDR20	6.3884e-05	ENST00000555879.5	0.959427	0.332396	0.384082	1.1555	208.09	180.206
WDR20	6.3884e-05	ENST00000558567.5	0.31195	0.316071	0.522409	1.65282	216.958	241.142
WDR33	0.000782323	ENST00000322313.9	1	0.390992	0.38627	0.987924	1114.85	1015.65
WDR33	0.000782323	ENST00000409658.7	0.0244277	0.128857	0.180031	1.39714	364.762	475.036
WDR33	0.000782323	ENST00000436787.5	0.293682	0.480152	0.433699	0.903255	1369.67	1142.73
WTAP	2.7307e-05	ENST00000337387.4	0.00448739	0.481574	0.562773	1.16861	1868.24	2136.72
WTAP	2.7307e-05	ENST00000621533.5	0.00448739	0.518426	0.437227	0.843374	2012.72	1651.51
ZBTB32	3.24328e-08	ENST00000392197.7	NA	0.217247	0	0	30.2033	0
ZBTB32	3.24328e-08	ENST00000442282.1	0.966428	0.191393	0.237209	1.23938	25.9801	28.3137
ZBTB32	3.24328e-08	ENST00000451726.1	0.355995	0.59136	0.762791	1.28989	94.2826	99.6639
ZC3H7A	0.000212837	ENST00000355758.9	0.0207363	0.824137	0.739782	0.897645	2409.2	2259.55
ZC3H7A	0.000212837	ENST00000576247.1	0.0207363	0.175863	0.260218	1.47966	511.572	797.74
ZDHHC14	2.32198e-05	ENST00000341375.12	0.000933194	0.419202	0.190102	0.453486	123.687	41.2318
ZDHHC14	2.32198e-05	ENST00000414563.6	0.163678	0.382204	0.534216	1.39772	112.121	116.35
ZDHHC14	2.32198e-05	ENST00000518214.5	0.644555	0.198594	0.275681	1.38817	56.7797	59.2098
ZFHX3	0.00126711	ENST00000268489.10	0.0669371	0.833528	0.709532	0.85124	541.256	464.785
ZFHX3	0.00126711	ENST00000397992.5	0.0669371	0.166472	0.290468	1.74484	107.382	189.326
ZHX3	3.02054e-05	ENST00000309060.7	0.000173768	0.171043	0.0915584	0.535294	327.694	174.112
ZHX3	3.02054e-05	ENST00000421422.1	0.607455	0.216556	0.250664	1.1575	416.657	482.911
ZHX3	3.02054e-05	ENST00000432768.6	0.929825	0.230588	0.248368	1.07711	440.065	478.121
ZHX3	3.02054e-05	ENST00000441102.6	0.975838	0.192174	0.203989	1.06148	366.775	393.552
ZHX3	3.02054e-05	ENST00000559234.5	0.939125	0.189639	0.20542	1.08322	361.878	396.922
ZMAT2	0.000294635	ENST00000274712.8	0.0260503	0.862011	0.917484	1.06435	5675.41	6156.83
ZMAT2	0.000294635	ENST00000506644.3	0.0260503	0.137989	0.0825162	0.597993	909.741	547.131
ZMIZ2	0.000104945	ENST00000265346.11	0.00313496	0.114459	0.208608	1.82256	171.054	254.768
ZMIZ2	0.000104945	ENST00000309315.9	0.894372	0.402613	0.371529	0.922794	609.231	450.794
ZMIZ2	0.000104945	ENST00000413916.5	1	0.284059	0.27393	0.964339	429.537	331.53
ZMIZ2	0.000104945	ENST00000457123.5	0.31195	0.198869	0.145934	0.733819	304.922	176.952
ZNF219	0.0002285	ENST00000360947.8	0.0214369	0.858095	0.656875	0.765505	463.591	290.419
ZNF219	0.0002285	ENST00000451119.6	0.0214369	0.141905	0.343125	2.41798	81.0805	150.43
ZNF256	0.00132387	ENST00000282308.4	0.0679954	0.897366	0.762064	0.849223	367.287	352.505
ZNF256	0.00132387	ENST00000598928.1	0.0679954	0.102634	0.237936	2.3183	38.6271	109.376
ZNF302	0.000582624	ENST00000423823.6	0.00224184	0.18374	0.0481621	0.26212	110.313	30.2808
ZNF302	0.000582624	ENST00000457781.6	0.552799	0.181525	0.260989	1.43775	108.189	116.696
ZNF302	0.000582624	ENST00000505365.2	1	0.12736	0.128977	1.01269	74.0583	55.8734
ZNF302	0.000582624	ENST00000510002.1	1	0.104189	0.117	1.12296	60.2154	50.2415
ZNF302	0.000582624	ENST00000613363.4	0.988174	0.134332	0.115908	0.862844	78.7998	51.2073
ZNF302	0.000582624	ENST00000627982.2	0.828915	0.268853	0.328965	1.22359	160.939	147.562
